# Supplementary material for: Identification of a ZC3H12D-Regulated Competing Endogenous RNA Network for Prognosis of Lung Adenocarcinoma at Single-Cell Level
Source: Research Square preprint supplement (doi:10.21203/rs.3.rs-603118/v1), 2021-06-15
Supplement: Supplementary file 1 [file aa9e833a70ed5caf70af3e3b.xlsx]

## Sheet: lncRNA_and_mRNA_ceRNA_network_l
MSTRG.25036.2	hsa-miR-1226-3p	MDGA1
MSTRG.10259.1	hsa-miR-4446-3p	NECTIN1
MSTRG.18315.1	hsa-miR-365a-5p	LMCD1
MSTRG.26440.2	hsa-miR-34a-5p	GNB1L
MSTRG.7995.1	hsa-miR-4446-3p	GNB1L
MSTRG.13280.1	hsa-miR-449c-5p	KCTD16
MSTRG.13511.1	hsa-miR-365a-5p	KCNK3
MSTRG.16220.1	hsa-miR-296-3p	MDGA1
MSTRG.25922.1	hsa-miR-877-5p	KCTD16
MSTRG.5059.2	hsa-miR-296-3p	ADM2
MSTRG.17118.1	hsa-miR-4697-3p	WNT9A
MSTRG.2404.1	hsa-miR-5698	KIAA1644
MSTRG.5059.2	hsa-miR-5698	STX1B
MSTRG.3150.1	hsa-miR-1226-3p	KIF1A
MSTRG.5059.4	hsa-miR-4758-3p	PLAC4
MSTRG.22400.1	hsa-miR-5698	WNT9A
MSTRG.17082.1	hsa-miR-6815-5p	TNS1
MSTRG.22400.1	hsa-miR-92b-3p	GFOD1
MSTRG.18099.1	hsa-miR-34a-5p	WNT9A
MSTRG.1191.1	hsa-miR-508-5p	SLIT3
MSTRG.7694.1	hsa-miR-5698	KIAA1644
MSTRG.13511.1	hsa-miR-486-3p	CD34
MSTRG.17115.1	hsa-miR-877-3p	SLIT3
MSTRG.25922.1	hsa-miR-449a	KCNK3
MSTRG.7694.1	hsa-miR-5698	RAB11FIP4
MSTRG.17108.1	hsa-miR-449b-5p	KCNK3
MSTRG.13278.1	hsa-miR-4284	GFOD1
MSTRG.13280.1	hsa-miR-449b-5p	KCNK3
MSTRG.16807.21	hsa-miR-4652-5p	LMCD1
MSTRG.17082.1	hsa-miR-508-5p	CD34
MSTRG.13278.1	hsa-miR-1226-3p	ADARB2
MSTRG.26440.2	hsa-miR-877-3p	KIAA1644
MSTRG.3036.7	hsa-miR-449b-5p	2021-09-03
ENST00000441095	hsa-miR-216a-3p	MAP3K9
MSTRG.26440.2	hsa-miR-210-5p	POFUT2
MSTRG.16201.1	hsa-miR-216a-3p	KSR2
MSTRG.17087.1	hsa-miR-6815-5p	WNT9A
MSTRG.18099.1	hsa-miR-34a-5p	GFOD1
MSTRG.5059.2	hsa-miR-4433b-5p	PDK1
MSTRG.13711.1	hsa-miR-509-5p	MAP3K13
MSTRG.13507.1	hsa-miR-296-3p	WNT9A
MSTRG.16201.1	hsa-miR-486-3p	FOSL2
MSTRG.17108.1	hsa-miR-4443	TNS1
MSTRG.10260.1	hsa-miR-216a-3p	KSR2
MSTRG.1191.1	hsa-miR-4758-3p	CD34
MSTRG.20850.1	hsa-miR-365a-5p	TNS1
MSTRG.25922.1	hsa-miR-449a	WNT9A
MSTRG.13280.1	hsa-miR-449b-5p	WNT9A
MSTRG.13711.1	hsa-miR-486-5p	KSR2
MSTRG.25922.1	hsa-miR-449b-5p	MDGA1
MSTRG.7995.1	hsa-miR-216a-3p	TMEM184A
MSTRG.12336.1	hsa-miR-296-3p	LMCD1
MSTRG.1054.1	hsa-miR-6815-5p	WNT9A
MSTRG.5618.1	hsa-miR-365a-5p	ONECUT2
MSTRG.10259.1	hsa-miR-877-3p	SRCIN1
MSTRG.5059.2	hsa-miR-1226-3p	POFUT2
MSTRG.7995.1	hsa-miR-216a-3p	SYT12
MSTRG.25036.2	hsa-miR-10b-3p	MDGA1
MSTRG.13280.1	hsa-miR-508-5p	SLIT3
MSTRG.20417.1	hsa-miR-2682-5p	KCTD16
MSTRG.3150.1	hsa-miR-6815-5p	SBK1
MSTRG.22400.1	hsa-miR-4286	GFOD1
MSTRG.17108.1	hsa-miR-135b-3p	ADARB2
ENST00000617529	hsa-miR-708-5p	ADM2
MSTRG.17118.1	hsa-miR-4758-3p	CD34
MSTRG.3515.1	hsa-miR-365a-5p	TNS1
MSTRG.22400.1	hsa-miR-4652-5p	TNS1
MSTRG.19037.1	hsa-miR-508-5p	CD34
MSTRG.13278.1	hsa-miR-3660	WNT9A
MSTRG.22400.1	hsa-miR-1226-3p	GFOD1
ENST00000623760	hsa-miR-4758-3p	TMEM184A
MSTRG.10260.1	hsa-miR-449a	ADM2
MSTRG.26440.2	hsa-miR-449c-5p	2021-09-03
MSTRG.13511.1	hsa-miR-365a-5p	CD34
MSTRG.16220.1	hsa-miR-1226-3p	MDGA1
MSTRG.17322.1	hsa-miR-877-3p	SLIT3
MSTRG.13278.1	hsa-miR-135b-5p	ADARB2
MSTRG.18099.1	hsa-miR-508-5p	SLIT3
MSTRG.3150.1	hsa-miR-345-5p	GOLGA7B
MSTRG.21350.4	hsa-miR-4443	GREM1
MSTRG.26440.2	hsa-miR-331-3p	LIF
MSTRG.13511.1	hsa-miR-365a-5p	TNS1
MSTRG.10260.1	hsa-miR-708-5p	SLC7A5
MSTRG.17108.1	hsa-miR-6815-5p	TNS1
MSTRG.1191.1	hsa-miR-4446-3p	KCNK3
MSTRG.10259.1	hsa-miR-449a	NECTIN1
MSTRG.661.9	hsa-miR-4446-3p	MDGA1
MSTRG.10259.1	hsa-miR-92b-5p	STX1B
MSTRG.19168.1	hsa-miR-216a-3p	SLC7A5
MSTRG.13278.1	hsa-miR-449a	WNT9A
MSTRG.19035.1	hsa-miR-331-3p	MDGA1
MSTRG.17087.1	hsa-miR-296-3p	TNR
MSTRG.3624.3	hsa-miR-508-5p	GFOD1
MSTRG.2404.1	hsa-miR-296-3p	SYT12
MSTRG.19037.1	hsa-miR-424-5p	KCNK3
MSTRG.3150.1	hsa-miR-31-5p	MAP3K13
MSTRG.13711.1	hsa-miR-449b-5p	TMED3
MSTRG.17108.1	hsa-miR-4446-3p	WNT9A
MSTRG.5618.1	hsa-miR-4446-3p	SBK1
MSTRG.17115.1	hsa-miR-296-3p	TNR
ENST00000630242	hsa-miR-2682-5p	GNB1L
MSTRG.17118.1	hsa-miR-5698	CD34
MSTRG.3624.3	hsa-miR-331-3p	TNS1
MSTRG.4233.3	hsa-miR-4758-3p	PLAC4
ENST00000630242	hsa-miR-1269b	GNAO1
MSTRG.16807.21	hsa-miR-6815-5p	KCTD16
MSTRG.20417.1	hsa-miR-1269a	TNR
MSTRG.5618.1	hsa-miR-217	PLAC4
MSTRG.3036.7	hsa-miR-508-5p	PDK1
MSTRG.8730.1	hsa-miR-449a	NECTIN1
MSTRG.26440.2	hsa-miR-449b-5p	SRCIN1
MSTRG.18099.1	hsa-miR-449b-5p	MDGA1
MSTRG.26440.2	hsa-miR-187-3p	GREM1
MSTRG.3515.1	hsa-miR-1226-3p	ADARB2
MSTRG.13278.1	hsa-miR-3660	KCNK3
MSTRG.21350.4	hsa-miR-508-5p	ONECUT2
MSTRG.17087.1	hsa-miR-3660	LMCD1
MSTRG.4233.3	hsa-miR-92b-3p	GNB1L
ENST00000627566	hsa-miR-216a-3p	LMCD1
MSTRG.5059.2	hsa-miR-6815-5p	KIAA1644
MSTRG.13511.1	hsa-miR-486-3p	LMCD1
MSTRG.20417.1	hsa-miR-486-3p	KCNK3
MSTRG.661.9	hsa-miR-449c-5p	KCNK3
MSTRG.13278.1	hsa-miR-4652-5p	TNS1
MSTRG.4233.3	hsa-miR-514a-5p	LIF
ENST00000630242	hsa-miR-4446-3p	GNB1L
MSTRG.5059.2	hsa-miR-4659b-3p	SYT16
MSTRG.17082.1	hsa-miR-514a-5p	MDGA1
MSTRG.21350.4	hsa-miR-345-5p	KIAA1644
MSTRG.13711.1	hsa-miR-4697-3p	SLC7A5
MSTRG.10259.1	hsa-miR-449c-5p	MAP3K9
MSTRG.22400.1	hsa-miR-4446-3p	SLIT3
MSTRG.4233.3	hsa-miR-216a-3p	GNB1L
MSTRG.3036.7	hsa-miR-216a-3p	MAP3K13
MSTRG.17108.1	hsa-miR-4446-3p	KCNK3
MSTRG.10260.1	hsa-miR-216a-3p	ONECUT2
MSTRG.16807.21	hsa-miR-6815-5p	SLIT3
MSTRG.16807.21	hsa-miR-4446-3p	TNS1
MSTRG.20417.1	hsa-miR-296-3p	CD34
MSTRG.19035.1	hsa-miR-4652-5p	LMCD1
MSTRG.4233.3	hsa-miR-345-5p	ONECUT2
MSTRG.26440.2	hsa-miR-4697-5p	SLC7A5
MSTRG.10259.1	hsa-miR-4758-3p	NECTIN1
MSTRG.7694.1	hsa-miR-486-3p	SLC7A5
MSTRG.5059.4	hsa-miR-486-3p	SLC7A5
MSTRG.4233.3	hsa-miR-345-5p	NECTIN1
MSTRG.8730.1	hsa-miR-449a	ADM2
ENST00000617529	hsa-miR-508-5p	KIAA0513
MSTRG.7995.1	hsa-miR-216a-3p	RAB11FIP4
MSTRG.22400.1	hsa-miR-205-5p	GFOD1
MSTRG.5618.1	hsa-miR-514a-5p	2021-09-03
ENST00000630242	hsa-miR-4443	KSR2
ENST00000630242	hsa-miR-4446-3p	KSR2
MSTRG.16201.1	hsa-miR-4281	PLEKHG4B
MSTRG.10260.1	hsa-miR-449a	TMED3
MSTRG.19035.1	hsa-miR-6815-5p	LMCD1
MSTRG.16201.1	hsa-miR-1226-3p	PDK1
MSTRG.5618.1	hsa-miR-4728-3p	GNB1L
MSTRG.8730.1	hsa-miR-449b-5p	SRCIN1
MSTRG.3150.1	hsa-miR-1226-3p	GOLGA7B
MSTRG.10259.1	hsa-miR-449a	GOLGA7B
MSTRG.17118.1	hsa-miR-3660	LMCD1
MSTRG.10260.1	hsa-miR-216a-5p	ADM2
MSTRG.17322.1	hsa-miR-513c-5p	KCTD16
MSTRG.26440.2	hsa-miR-4446-3p	SYT16
MSTRG.16201.1	hsa-miR-6815-5p	ONECUT2
MSTRG.7995.1	hsa-miR-4446-3p	SYT16
MSTRG.5059.2	hsa-miR-4433b-5p	GREM1
MSTRG.19035.1	hsa-miR-34a-5p	GFOD1
MSTRG.16201.1	hsa-miR-4758-3p	GOLGA7B
MSTRG.13278.1	hsa-miR-4284	KCNK3
MSTRG.5059.2	hsa-miR-296-3p	ATP11A
ENST00000630242	hsa-miR-5698	KSR2
MSTRG.7694.1	hsa-miR-514a-5p	2021-09-03
MSTRG.16220.1	hsa-miR-449c-5p	TNR
MSTRG.18099.1	hsa-miR-34a-5p	MDGA1
MSTRG.17108.1	hsa-miR-4446-3p	TNS1
MSTRG.12336.1	hsa-miR-216a-3p	TNR
MSTRG.16201.1	hsa-miR-708-5p	KIAA0513
MSTRG.3624.3	hsa-miR-1226-3p	GFOD1
MSTRG.5059.2	hsa-miR-877-3p	KSR2
MSTRG.4233.3	hsa-miR-345-5p	ADM2
MSTRG.4233.3	hsa-miR-4758-3p	ONECUT2
MSTRG.1054.1	hsa-miR-449a	SLIT3
ENST00000441095	hsa-miR-92b-3p	CACNA1I
MSTRG.1191.1	hsa-miR-4443	CD34
MSTRG.1191.1	hsa-miR-664b-3p	CD34
MSTRG.22400.1	hsa-miR-449c-5p	TNR
MSTRG.17082.1	hsa-miR-217	WNT9A
MSTRG.26440.2	hsa-miR-4443	GREM1
MSTRG.25036.2	hsa-miR-4433b-5p	TNR
MSTRG.26440.2	hsa-miR-449b-3p	POFUT2
MSTRG.16220.1	hsa-miR-5698	KCNK3
MSTRG.4233.3	hsa-miR-4758-3p	RAB11FIP4
ENST00000630242	hsa-miR-877-3p	TMED3
MSTRG.4233.3	hsa-miR-4758-3p	ADM2
MSTRG.26440.2	hsa-miR-4446-3p	RAB11FIP4
MSTRG.16220.1	hsa-miR-877-3p	TNR
MSTRG.3150.1	hsa-miR-449a	NECTIN1
MSTRG.10259.1	hsa-miR-508-5p	KSR2
MSTRG.18099.1	hsa-miR-34a-5p	TNR
MSTRG.10260.1	hsa-miR-4758-3p	PLAC4
MSTRG.26440.2	hsa-miR-4446-3p	GNB1L
MSTRG.17322.1	hsa-miR-1226-3p	GFOD1
MSTRG.12336.1	hsa-miR-365a-5p	TNS1
MSTRG.7694.1	hsa-miR-509-3-5p	SYT16
MSTRG.4233.3	hsa-miR-654-5p	GNB1L
MSTRG.13278.1	hsa-miR-508-5p	GFOD1
MSTRG.13507.1	hsa-miR-3660	LMCD1
ENST00000623760	hsa-miR-4758-3p	ADM2
MSTRG.26440.2	hsa-miR-1226-3p	RAB11FIP4
MSTRG.16220.1	hsa-miR-4446-3p	TNS1
MSTRG.3624.3	hsa-miR-486-3p	KCNK3
MSTRG.5059.2	hsa-miR-516b-5p	LIF
MSTRG.22400.1	hsa-miR-486-3p	CD34
MSTRG.10259.1	hsa-miR-216a-3p	SBK1
MSTRG.1191.1	hsa-miR-449b-5p	KCNK3
MSTRG.26440.2	hsa-miR-5698	KIAA1644
MSTRG.4233.3	hsa-miR-216a-3p	KSR2
MSTRG.10260.1	hsa-miR-6815-5p	ONECUT2
MSTRG.18315.1	hsa-miR-508-5p	SLIT3
MSTRG.1191.1	hsa-miR-449a	KCNK3
MSTRG.16201.1	hsa-miR-514a-5p	KSR2
MSTRG.10260.1	hsa-miR-1226-3p	RAB11FIP4
MSTRG.8730.1	hsa-miR-449b-5p	2021-09-03
MSTRG.17108.1	hsa-miR-449c-5p	TNR
MSTRG.17082.1	hsa-miR-210-5p	TNS1
MSTRG.26440.2	hsa-miR-449a	SRCIN1
MSTRG.13278.1	hsa-miR-4758-3p	KCNK3
MSTRG.5618.1	hsa-miR-877-5p	KSR2
MSTRG.22400.1	hsa-miR-4286	CD34
MSTRG.17322.1	hsa-miR-508-5p	CD34
MSTRG.17087.1	hsa-miR-552-3p	CD34
MSTRG.20850.1	hsa-miR-4286	GFOD1
MSTRG.12336.1	hsa-miR-296-3p	WNT9A
MSTRG.22400.1	hsa-miR-331-3p	CD34
MSTRG.13711.1	hsa-miR-509-3-5p	GOLGA7B
MSTRG.19168.1	hsa-miR-365a-5p	GREM1
MSTRG.26440.2	hsa-miR-4758-3p	TMED3
MSTRG.18099.1	hsa-miR-5698	SLIT3
MSTRG.3515.1	hsa-miR-365a-5p	MDGA1
MSTRG.5059.2	hsa-miR-1226-3p	MAP3K9
ENST00000623760	hsa-miR-4433b-5p	GREM1
MSTRG.7995.1	hsa-miR-431-5p	KIAA0513
MSTRG.10260.1	hsa-miR-331-3p	KSR2
MSTRG.19037.1	hsa-miR-4697-3p	WNT9A
MSTRG.20850.1	hsa-miR-4446-3p	TNS1
MSTRG.16201.1	hsa-miR-4281	SBK1
MSTRG.16201.1	hsa-miR-449c-5p	FOSL2
MSTRG.22400.1	hsa-miR-1226-3p	ADARB2
MSTRG.10260.1	hsa-miR-4758-3p	NECTIN1
ENST00000441095	hsa-miR-4446-3p	SBK1
MSTRG.16220.1	hsa-miR-296-3p	WNT9A
MSTRG.22318.1	hsa-miR-224-5p	MDGA1
MSTRG.13278.1	hsa-miR-877-3p	CD34
MSTRG.1191.1	hsa-miR-514a-5p	MDGA1
MSTRG.17115.1	hsa-miR-877-3p	GFOD1
MSTRG.19035.1	hsa-miR-4758-3p	CD34
MSTRG.17087.1	hsa-miR-4728-3p	MDGA1
MSTRG.17322.1	hsa-miR-449c-5p	TNR
MSTRG.25036.2	hsa-miR-449a	SLIT3
MSTRG.19037.1	hsa-miR-516b-5p	GFOD1
MSTRG.16201.1	hsa-miR-4443	MAP3K13
ENST00000630242	hsa-miR-4443	GNB1L
MSTRG.26440.2	hsa-miR-34a-5p	TMED3
ENST00000630242	hsa-miR-1226-3p	NECTIN1
MSTRG.3036.7	hsa-miR-31-5p	TMED3
MSTRG.13280.1	hsa-miR-4446-3p	WNT9A
MSTRG.17108.1	hsa-miR-296-3p	CD34
MSTRG.7995.1	hsa-miR-4446-3p	ADM2
ENST00000630242	hsa-miR-4697-3p	SLC7A5
MSTRG.1191.1	hsa-miR-4443	SLIT3
MSTRG.13278.1	hsa-miR-365a-5p	CD34
MSTRG.26440.2	hsa-miR-21-3p	RAB11FIP4
MSTRG.7694.1	hsa-miR-345-5p	KIAA1644
MSTRG.8730.1	hsa-miR-4652-5p	SLC7A5
MSTRG.26440.2	hsa-miR-4758-3p	KIAA0513
ENST00000630242	hsa-miR-1226-3p	BMF
MSTRG.8730.1	hsa-miR-148a-3p	KIAA0513
MSTRG.13278.1	hsa-miR-6815-5p	WNT9A
MSTRG.17118.1	hsa-miR-708-5p	MDGA1
MSTRG.10259.1	hsa-miR-210-5p	GOLGA7B
MSTRG.7694.1	hsa-miR-1226-3p	RAB11FIP4
MSTRG.5059.4	hsa-miR-210-5p	SYT12
MSTRG.17108.1	hsa-miR-877-5p	KCTD16
MSTRG.16201.1	hsa-miR-6815-5p	SBK1
ENST00000617529	hsa-miR-2682-5p	LIF
MSTRG.16201.1	hsa-miR-1226-3p	GOLGA7B
MSTRG.16201.1	hsa-miR-6815-5p	KIAA0513
MSTRG.22400.1	hsa-miR-365a-5p	MDGA1
MSTRG.22400.1	hsa-miR-449b-5p	SLIT3
MSTRG.25036.2	hsa-miR-4659b-3p	KCTD16
MSTRG.17108.1	hsa-miR-365a-5p	MDGA1
MSTRG.16807.21	hsa-miR-4446-3p	WNT9A
MSTRG.10260.1	hsa-miR-210-5p	POFUT2
MSTRG.26440.2	hsa-miR-449c-5p	PLAC4
MSTRG.1054.1	hsa-miR-4446-3p	TNS1
MSTRG.19168.1	hsa-miR-5698	KIF1A
MSTRG.19035.1	hsa-miR-449b-5p	MDGA1
MSTRG.13278.1	hsa-miR-296-3p	MDGA1
ENST00000630242	hsa-miR-4443	GNAO1
MSTRG.26440.2	hsa-miR-216a-3p	SLC7A5
MSTRG.7995.1	hsa-miR-509-5p	PLEKHG4B
MSTRG.7694.1	hsa-miR-514a-5p	LIF
MSTRG.17322.1	hsa-miR-654-5p	KCNK3
MSTRG.17322.1	hsa-miR-4446-3p	KCNK3
MSTRG.10259.1	hsa-miR-21-3p	RAB11FIP4
ENST00000627566	hsa-miR-514b-5p	ADARB2
MSTRG.25922.1	hsa-miR-345-5p	TNS1
MSTRG.17322.1	hsa-miR-486-3p	KCNK3
MSTRG.3150.1	hsa-miR-449b-5p	NECTIN1
MSTRG.3624.3	hsa-miR-449a	WNT9A
MSTRG.20417.1	hsa-miR-877-5p	CD34
MSTRG.4233.3	hsa-miR-345-5p	KIAA1644
MSTRG.25036.2	hsa-miR-877-3p	CD34
MSTRG.18315.1	hsa-miR-331-3p	CD34
MSTRG.13711.1	hsa-miR-2682-5p	2021-09-03
MSTRG.10260.1	hsa-miR-4446-3p	ONECUT2
MSTRG.3624.3	hsa-miR-508-5p	SLIT3
MSTRG.5618.1	hsa-miR-508-5p	KIAA0513
MSTRG.26440.2	hsa-miR-552-3p	STX1B
MSTRG.26440.2	hsa-miR-549a	ATP11A
MSTRG.1054.1	hsa-miR-31-5p	CD34
MSTRG.4233.3	hsa-miR-216a-3p	RAB11FIP4
MSTRG.7995.1	hsa-miR-508-5p	KSR2
MSTRG.17087.1	hsa-miR-513c-5p	CD34
MSTRG.17082.1	hsa-miR-486-3p	KCNK3
MSTRG.7995.1	hsa-miR-508-5p	RAB11FIP4
MSTRG.16201.1	hsa-miR-449b-5p	GOLGA7B
MSTRG.4233.3	hsa-miR-6815-5p	POFUT2
MSTRG.17108.1	hsa-miR-3660	KCNK3
MSTRG.22400.1	hsa-miR-216a-3p	CD34
MSTRG.16201.1	hsa-miR-331-3p	TMEM184A
MSTRG.10260.1	hsa-miR-4446-3p	MAP3K9
MSTRG.13278.1	hsa-miR-345-5p	TNS1
MSTRG.4233.3	hsa-miR-5698	KSR2
MSTRG.3515.1	hsa-miR-514a-5p	MDGA1
MSTRG.1191.1	hsa-miR-509-5p	ADARB2
MSTRG.661.9	hsa-miR-449a	KCNK3
MSTRG.3515.1	hsa-miR-514b-5p	ADARB2
MSTRG.2404.1	hsa-miR-508-5p	GOLGA7B
MSTRG.22318.1	hsa-miR-4758-3p	KCNK3
MSTRG.18315.1	hsa-miR-210-5p	GFOD1
ENST00000630242	hsa-miR-345-5p	ZC3H12D
MSTRG.8730.1	hsa-miR-449c-5p	GNB1L
MSTRG.19168.1	hsa-miR-4758-3p	KIF1A
MSTRG.2404.1	hsa-miR-877-5p	TMED3
MSTRG.8730.1	hsa-miR-6815-5p	KIAA1644
MSTRG.10259.1	hsa-miR-4446-3p	SRCIN1
MSTRG.26440.2	hsa-miR-514a-5p	2021-09-03
MSTRG.3515.1	hsa-miR-212-3p	KCNK3
MSTRG.13711.1	hsa-miR-449b-5p	GOLGA7B
MSTRG.21350.4	hsa-miR-508-5p	GOLGA7B
MSTRG.16220.1	hsa-miR-508-5p	CD34
ENST00000630242	hsa-miR-365a-5p	BMF
MSTRG.13511.1	hsa-miR-4443	SLIT3
MSTRG.26440.2	hsa-miR-4443	KSR2
MSTRG.17082.1	hsa-miR-4728-3p	GFOD1
MSTRG.18099.1	hsa-miR-877-3p	SLIT3
MSTRG.10260.1	hsa-miR-296-3p	2021-09-03
MSTRG.22400.1	hsa-miR-516b-5p	GFOD1
MSTRG.7995.1	hsa-miR-210-5p	SNPH
MSTRG.16220.1	hsa-miR-654-5p	KCNK3
MSTRG.17087.1	hsa-miR-331-3p	CD34
MSTRG.17108.1	hsa-miR-1226-3p	MDGA1
MSTRG.13507.1	hsa-miR-331-3p	CD34
MSTRG.13280.1	hsa-miR-210-5p	GFOD1
MSTRG.17115.1	hsa-miR-552-3p	CD34
MSTRG.13711.1	hsa-miR-196a-5p	GREM1
MSTRG.3150.1	hsa-miR-4446-3p	2021-09-03
MSTRG.16201.1	hsa-miR-3660	TMED3
MSTRG.1191.1	hsa-miR-4728-3p	GFOD1
MSTRG.3036.7	hsa-miR-509-3-5p	GOLGA7B
MSTRG.16807.21	hsa-miR-449c-5p	KCTD16
MSTRG.3036.7	hsa-miR-135a-5p	TMED3
MSTRG.13280.1	hsa-miR-2277-3p	TNS1
MSTRG.1054.1	hsa-miR-508-5p	SLIT3
MSTRG.26440.2	hsa-miR-654-5p	KSR2
MSTRG.8730.1	hsa-miR-34a-5p	GNB1L
MSTRG.5618.1	hsa-miR-4443	GNB1L
MSTRG.17108.1	hsa-miR-6815-5p	LMCD1
ENST00000630242	hsa-miR-1226-3p	KIAA1644
MSTRG.5059.4	hsa-miR-4446-3p	RAB11FIP4
MSTRG.7995.1	hsa-miR-509-3-5p	MAP3K13
MSTRG.16201.1	hsa-miR-217	SOX11
MSTRG.10260.1	hsa-miR-508-5p	KIAA0513
MSTRG.7995.1	hsa-miR-210-5p	MAP3K13
MSTRG.2404.1	hsa-miR-5698	PDK1
MSTRG.17322.1	hsa-miR-3660	LMCD1
MSTRG.12336.1	hsa-miR-216a-3p	CD34
MSTRG.7694.1	hsa-miR-1226-3p	ONECUT2
MSTRG.7995.1	hsa-miR-216a-3p	MAP3K13
MSTRG.5618.1	hsa-miR-4446-3p	MAP3K9
MSTRG.10260.1	hsa-miR-4446-3p	NECTIN1
MSTRG.1054.1	hsa-miR-508-5p	GFOD1
MSTRG.661.9	hsa-miR-296-3p	TNR
ENST00000627566	hsa-miR-5698	KCNK3
MSTRG.13278.1	hsa-miR-4758-3p	GFOD1
MSTRG.1054.1	hsa-miR-5698	CD34
MSTRG.13280.1	hsa-miR-5698	KCNK3
MSTRG.8730.1	hsa-miR-449c-5p	PLAC4
MSTRG.1191.1	hsa-miR-1226-3p	ADARB2
MSTRG.12336.1	hsa-miR-296-3p	MDGA1
MSTRG.13278.1	hsa-miR-5698	MDGA1
MSTRG.1054.1	hsa-miR-5698	SLIT3
MSTRG.22318.1	hsa-miR-4446-3p	SLIT3
ENST00000630242	hsa-miR-449c-5p	TMEM184A
MSTRG.1054.1	hsa-miR-449b-5p	WNT9A
MSTRG.16201.1	hsa-miR-4758-3p	SYT12
MSTRG.26440.2	hsa-miR-486-3p	SBK1
MSTRG.17108.1	hsa-miR-6815-5p	WNT9A
MSTRG.3150.1	hsa-miR-449b-5p	2021-09-03
MSTRG.13280.1	hsa-miR-216a-3p	KCTD16
MSTRG.19035.1	hsa-miR-6815-5p	CD34
MSTRG.3036.7	hsa-miR-509-3-5p	MAP3K13
MSTRG.17087.1	hsa-miR-296-3p	LMCD1
MSTRG.661.9	hsa-miR-217	WNT9A
ENST00000630242	hsa-miR-210-3p	ATP11A
MSTRG.16201.1	hsa-miR-210-5p	SYT12
MSTRG.25922.1	hsa-miR-877-3p	CD34
MSTRG.17322.1	hsa-miR-877-5p	CD34
MSTRG.13511.1	hsa-miR-296-3p	WNT9A
MSTRG.17087.1	hsa-miR-31-5p	CD34
MSTRG.10260.1	hsa-miR-1226-3p	KIAA1644
MSTRG.7694.1	hsa-miR-210-5p	STX1B
MSTRG.661.9	hsa-miR-365a-5p	CD34
ENST00000630242	hsa-miR-4446-3p	ATP11A
MSTRG.26440.2	hsa-miR-210-5p	CACNA1I
MSTRG.10260.1	hsa-miR-654-5p	GNB1L
MSTRG.8730.1	hsa-miR-6815-5p	GREM1
MSTRG.2404.1	hsa-miR-205-5p	TMEM184A
MSTRG.19037.1	hsa-miR-508-5p	TNR
MSTRG.22318.1	hsa-miR-210-5p	TNS1
MSTRG.16201.1	hsa-miR-514b-5p	PLEKHG4B
ENST00000623760	hsa-miR-4758-3p	TMED3
MSTRG.2404.1	hsa-miR-542-3p	OPRD1
MSTRG.18099.1	hsa-miR-449c-5p	KCNK3
MSTRG.26440.2	hsa-miR-552-3p	SRCIN1
MSTRG.5618.1	hsa-miR-4446-3p	NECTIN1
MSTRG.20417.1	hsa-miR-4446-3p	WNT9A
ENST00000630242	hsa-miR-4446-3p	SYT16
MSTRG.3036.7	hsa-miR-449b-5p	ADM2
MSTRG.7995.1	hsa-miR-212-3p	TMED3
MSTRG.10260.1	hsa-miR-216a-3p	GNB1L
MSTRG.3624.3	hsa-miR-509-5p	WNT9A
MSTRG.13280.1	hsa-miR-5698	SLIT3
MSTRG.1191.1	hsa-miR-34a-5p	SLIT3
MSTRG.3624.3	hsa-miR-486-3p	LMCD1
MSTRG.5059.2	hsa-miR-708-3p	PLAC4
MSTRG.7995.1	hsa-miR-4728-3p	KSR2
MSTRG.16201.1	hsa-miR-216a-3p	SBK1
MSTRG.3036.7	hsa-miR-6815-5p	ONECUT2
MSTRG.16201.1	hsa-miR-449a	TMED3
MSTRG.661.9	hsa-miR-449c-5p	SLIT3
MSTRG.4233.3	hsa-miR-4758-3p	TMED3
MSTRG.16201.1	hsa-miR-486-5p	KSR2
MSTRG.22400.1	hsa-miR-4728-3p	GFOD1
MSTRG.18099.1	hsa-miR-345-5p	TNS1
MSTRG.4233.3	hsa-miR-4758-3p	BMF
MSTRG.19168.1	hsa-miR-2682-5p	LIF
MSTRG.25036.2	hsa-miR-3660	WNT9A
MSTRG.17087.1	hsa-miR-296-3p	CD34
MSTRG.661.9	hsa-miR-365a-5p	MDGA1
MSTRG.17082.1	hsa-miR-21-3p	LMCD1
MSTRG.3624.3	hsa-miR-449b-5p	MDGA1
MSTRG.10260.1	hsa-miR-345-5p	ADM2
MSTRG.1054.1	hsa-miR-516b-5p	KCNK3
MSTRG.16807.21	hsa-miR-6815-5p	CD34
MSTRG.5059.4	hsa-miR-92b-3p	GNB1L
MSTRG.5059.2	hsa-miR-6815-5p	GREM1
MSTRG.25922.1	hsa-miR-296-3p	MDGA1
MSTRG.10260.1	hsa-miR-345-5p	KSR2
MSTRG.3036.7	hsa-miR-216a-3p	TMEM184A
MSTRG.3150.1	hsa-miR-216a-5p	ADM2
MSTRG.2404.1	hsa-miR-130b-3p	MAP3K9
MSTRG.19168.1	hsa-miR-216a-3p	ONECUT2
MSTRG.10260.1	hsa-miR-654-5p	ATP11A
MSTRG.22400.1	hsa-miR-486-3p	KCNK3
ENST00000441095	hsa-miR-216a-3p	RAB11FIP4
MSTRG.1191.1	hsa-miR-4758-3p	GFOD1
MSTRG.3624.3	hsa-miR-10b-3p	MDGA1
MSTRG.12336.1	hsa-miR-877-3p	CD34
MSTRG.5059.2	hsa-miR-486-3p	SLC7A5
MSTRG.8730.1	hsa-miR-6815-5p	POFUT2
MSTRG.1054.1	hsa-miR-1226-3p	GFOD1
MSTRG.17322.1	hsa-miR-1226-3p	ADARB2
ENST00000630242	hsa-miR-210-5p	TMEM184A
MSTRG.17322.1	hsa-miR-508-5p	SLIT3
MSTRG.4233.3	hsa-miR-508-5p	ONECUT2
MSTRG.25922.1	hsa-miR-1269a	LMCD1
MSTRG.17082.1	hsa-miR-34a-5p	MDGA1
MSTRG.16807.21	hsa-miR-449c-5p	SLIT3
MSTRG.17087.1	hsa-miR-6815-5p	SLIT3
MSTRG.25036.2	hsa-miR-1226-3p	ADARB2
MSTRG.25922.1	hsa-miR-514a-5p	MDGA1
MSTRG.26440.2	hsa-miR-21-3p	NECTIN1
MSTRG.2404.1	hsa-miR-5698	TMEM184A
MSTRG.5618.1	hsa-miR-449c-5p	SRCIN1
ENST00000630242	hsa-miR-210-5p	MAP3K13
MSTRG.16220.1	hsa-miR-34a-5p	TNR
ENST00000441095	hsa-miR-216a-3p	SBK1
MSTRG.17322.1	hsa-miR-331-3p	TNS1
MSTRG.13280.1	hsa-miR-508-5p	GFOD1
MSTRG.22400.1	hsa-miR-4758-3p	GFOD1
MSTRG.19037.1	hsa-miR-508-5p	GFOD1
MSTRG.26440.2	hsa-miR-210-5p	KSR2
MSTRG.18099.1	hsa-miR-516b-5p	KCNK3
MSTRG.13511.1	hsa-miR-449a	WNT9A
MSTRG.25036.2	hsa-miR-449c-5p	SLIT3
MSTRG.20417.1	hsa-miR-486-3p	WNT9A
MSTRG.19037.1	hsa-miR-4443	SLIT3
MSTRG.21350.4	hsa-miR-331-3p	GREM1
MSTRG.1054.1	hsa-miR-217	WNT9A
MSTRG.18099.1	hsa-miR-449b-5p	WNT9A
MSTRG.16807.21	hsa-miR-509-5p	WNT9A
ENST00000623760	hsa-miR-216a-3p	ONECUT2
MSTRG.17087.1	hsa-miR-34a-5p	GFOD1
MSTRG.20417.1	hsa-miR-508-5p	TNR
MSTRG.19035.1	hsa-miR-34a-5p	KCNK3
MSTRG.25922.1	hsa-miR-486-3p	CD34
MSTRG.3624.3	hsa-miR-449a	SLIT3
MSTRG.7995.1	hsa-miR-508-5p	ZC3H12D
MSTRG.17108.1	hsa-miR-3660	LMCD1
MSTRG.5618.1	hsa-miR-4697-3p	SLC7A5
MSTRG.5059.2	hsa-miR-486-3p	RAB11FIP4
MSTRG.3150.1	hsa-miR-296-3p	GOLGA7B
MSTRG.3150.1	hsa-miR-615-3p	GNAO1
MSTRG.1054.1	hsa-miR-6815-5p	LMCD1
MSTRG.13278.1	hsa-miR-877-3p	GFOD1
MSTRG.5618.1	hsa-miR-1269a	PDK1
MSTRG.2404.1	hsa-miR-205-5p	ADM2
MSTRG.20417.1	hsa-miR-296-3p	LMCD1
MSTRG.16201.1	hsa-miR-4532	PLEKHG4B
MSTRG.19037.1	hsa-miR-92b-3p	GFOD1
MSTRG.8730.1	hsa-miR-508-5p	KSR2
MSTRG.17082.1	hsa-miR-4758-3p	KCNK3
MSTRG.17108.1	hsa-miR-4443	SLIT3
MSTRG.7694.1	hsa-miR-216a-3p	KSR2
MSTRG.3624.3	hsa-miR-34a-5p	KCNK3
MSTRG.7995.1	hsa-miR-4446-3p	GNAO1
MSTRG.26440.2	hsa-miR-2682-5p	GNB1L
MSTRG.12336.1	hsa-miR-877-3p	SLIT3
MSTRG.2404.1	hsa-miR-3660	TMED3
MSTRG.22400.1	hsa-miR-4286	LMCD1
MSTRG.26440.2	hsa-miR-4758-3p	ADM2
ENST00000630242	hsa-miR-216a-3p	SBK1
MSTRG.17087.1	hsa-miR-449c-5p	KCNK3
MSTRG.10260.1	hsa-miR-5698	KSR2
MSTRG.3036.7	hsa-miR-508-5p	GOLGA7B
MSTRG.13280.1	hsa-miR-129-5p	KCTD16
MSTRG.17322.1	hsa-miR-508-5p	GFOD1
MSTRG.5618.1	hsa-miR-4446-3p	RAB11FIP4
MSTRG.22318.1	hsa-miR-4758-3p	CD34
ENST00000630242	hsa-miR-365a-5p	ATP11A
MSTRG.16220.1	hsa-miR-34a-5p	WNT9A
MSTRG.26440.2	hsa-miR-4443	GNB1L
ENST00000441095	hsa-miR-449b-5p	GNB1L
MSTRG.7995.1	hsa-miR-431-5p	PLAC4
MSTRG.17118.1	hsa-miR-449c-5p	SLIT3
MSTRG.18099.1	hsa-miR-3660	KCNK3
MSTRG.13507.1	hsa-miR-296-3p	TNR
MSTRG.13278.1	hsa-miR-449c-5p	SLIT3
MSTRG.2404.1	hsa-miR-449b-5p	GOLGA7B
MSTRG.7995.1	hsa-miR-509-5p	MAP3K13
MSTRG.7995.1	hsa-miR-216a-3p	SYT16
MSTRG.13278.1	hsa-miR-6815-5p	KCTD16
MSTRG.661.9	hsa-miR-296-3p	WNT9A
ENST00000630242	hsa-miR-210-5p	STX1B
MSTRG.25036.2	hsa-miR-449b-5p	SLIT3
MSTRG.18315.1	hsa-miR-345-5p	TNS1
MSTRG.20850.1	hsa-miR-92b-3p	GFOD1
MSTRG.7995.1	hsa-miR-4446-3p	NECTIN1
MSTRG.19037.1	hsa-miR-6815-5p	MDGA1
MSTRG.16201.1	hsa-miR-31-5p	OPRD1
MSTRG.26440.2	hsa-miR-2682-5p	LIF
ENST00000630242	hsa-miR-4446-3p	GNAO1
MSTRG.12336.1	hsa-miR-2682-5p	KCTD16
MSTRG.4233.3	hsa-miR-4281	RAB11FIP4
MSTRG.7694.1	hsa-miR-345-5p	KSR2
MSTRG.10260.1	hsa-miR-34a-5p	TMED3
MSTRG.16201.1	hsa-miR-708-5p	FOSL2
MSTRG.18315.1	hsa-miR-708-3p	MDGA1
MSTRG.22400.1	hsa-miR-34a-5p	SLIT3
MSTRG.10259.1	hsa-miR-210-5p	STX1B
MSTRG.5059.2	hsa-miR-4446-3p	KIAA0513
MSTRG.5059.4	hsa-miR-4446-3p	GNAO1
ENST00000627566	hsa-miR-486-3p	WNT9A
MSTRG.5618.1	hsa-miR-4443	SLC7A5
ENST00000630242	hsa-miR-345-5p	NECTIN1
MSTRG.5059.4	hsa-miR-4446-3p	TMED3
MSTRG.3036.7	hsa-miR-31-3p	SYT16
MSTRG.26440.2	hsa-miR-31-5p	TMED3
MSTRG.4233.3	hsa-miR-216a-3p	SYT16
MSTRG.19037.1	hsa-miR-509-3-5p	WNT9A
MSTRG.17082.1	hsa-miR-6815-5p	LMCD1
MSTRG.1191.1	hsa-miR-365a-5p	TNS1
MSTRG.5059.2	hsa-miR-1269b	PDK1
MSTRG.18099.1	hsa-miR-365a-5p	CD34
MSTRG.19035.1	hsa-miR-449c-5p	SLIT3
MSTRG.19168.1	hsa-miR-503-5p	KIF1A
MSTRG.4233.3	hsa-miR-654-5p	SLC7A5
MSTRG.3624.3	hsa-miR-182-5p	TNR
MSTRG.22400.1	hsa-miR-877-3p	GFOD1
MSTRG.13711.1	hsa-miR-4446-3p	ZC3H12D
MSTRG.18315.1	hsa-miR-331-3p	GFOD1
MSTRG.5618.1	hsa-miR-449b-3p	GOLGA7B
ENST00000630242	hsa-miR-5698	PDK1
MSTRG.19037.1	hsa-miR-205-5p	GFOD1
MSTRG.8730.1	hsa-miR-210-5p	KSR2
ENST00000627566	hsa-miR-2682-5p	SLIT3
MSTRG.25036.2	hsa-miR-3660	KCNK3
MSTRG.7995.1	hsa-miR-4758-3p	TMEM184A
MSTRG.13278.1	hsa-miR-449b-5p	KCNK3
MSTRG.13278.1	hsa-miR-10b-3p	MDGA1
MSTRG.3150.1	hsa-miR-296-3p	KIF1A
MSTRG.1054.1	hsa-miR-513c-5p	KCTD16
ENST00000441095	hsa-miR-6815-5p	SBK1
MSTRG.22400.1	hsa-miR-5698	SLIT3
MSTRG.22400.1	hsa-miR-708-5p	GFOD1
MSTRG.13278.1	hsa-miR-216a-3p	CD34
MSTRG.16201.1	hsa-miR-5698	KIAA1644
MSTRG.19168.1	hsa-miR-216a-3p	GREM1
MSTRG.12336.1	hsa-miR-516b-5p	GFOD1
MSTRG.21350.4	hsa-miR-92b-3p	MAP3K13
MSTRG.17115.1	hsa-miR-365a-5p	CD34
ENST00000623760	hsa-miR-6815-5p	ONECUT2
MSTRG.21350.4	hsa-miR-331-3p	SYT12
MSTRG.16201.1	hsa-miR-331-3p	GREM1
MSTRG.5059.4	hsa-miR-4697-3p	SLC7A5
MSTRG.5059.4	hsa-miR-4758-3p	RAB11FIP4
MSTRG.26440.2	hsa-miR-216a-3p	ONECUT2
MSTRG.5059.2	hsa-miR-6815-5p	POFUT2
MSTRG.22400.1	hsa-miR-877-3p	SLIT3
MSTRG.16201.1	hsa-miR-4446-3p	SBK1
MSTRG.1054.1	hsa-miR-34a-5p	KCNK3
MSTRG.13278.1	hsa-miR-5698	KCNK3
MSTRG.7995.1	hsa-miR-514a-5p	KSR2
MSTRG.19035.1	hsa-miR-449c-5p	GFOD1
MSTRG.22400.1	hsa-miR-877-3p	CD34
MSTRG.26440.2	hsa-miR-424-5p	ONECUT2
MSTRG.26440.2	hsa-miR-4758-3p	POFUT2
MSTRG.3036.7	hsa-miR-30a-3p	TMED3
MSTRG.25036.2	hsa-miR-3660	LMCD1
MSTRG.16807.21	hsa-miR-4286	CD34
MSTRG.13711.1	hsa-miR-4443	SLC7A5
MSTRG.10259.1	hsa-miR-21-3p	OPRD1
MSTRG.10259.1	hsa-miR-449a	TMED3
MSTRG.13278.1	hsa-miR-877-5p	KCTD16
MSTRG.7995.1	hsa-miR-216a-3p	GNB1L
MSTRG.3515.1	hsa-miR-365a-5p	KCNK3
ENST00000630242	hsa-miR-4443	KIAA1644
MSTRG.17108.1	hsa-miR-144-5p	ADARB2
MSTRG.16201.1	hsa-miR-4281	TMEM184A
MSTRG.16201.1	hsa-miR-4446-3p	KIAA0513
MSTRG.10259.1	hsa-miR-187-3p	KSR2
MSTRG.26440.2	hsa-miR-449b-3p	KIAA1644
MSTRG.3036.7	hsa-miR-216a-3p	SYT16
MSTRG.13507.1	hsa-miR-216a-3p	TNR
MSTRG.17108.1	hsa-miR-5698	CD34
MSTRG.19168.1	hsa-miR-4758-3p	SYT12
MSTRG.13511.1	hsa-miR-216a-3p	TNR
ENST00000630242	hsa-miR-210-5p	POFUT2
MSTRG.7995.1	hsa-miR-4446-3p	TMED3
MSTRG.3150.1	hsa-miR-508-5p	PDK1
MSTRG.5059.2	hsa-miR-6815-5p	NECTIN1
MSTRG.7694.1	hsa-miR-5698	KSR2
MSTRG.16807.21	hsa-miR-4446-3p	SLIT3
MSTRG.26440.2	hsa-miR-509-3-5p	SYT16
MSTRG.26440.2	hsa-miR-877-5p	TMED3
ENST00000441095	hsa-miR-449a	TMED3
MSTRG.26440.2	hsa-miR-708-5p	SRCIN1
MSTRG.17087.1	hsa-miR-877-5p	CD34
ENST00000630242	hsa-miR-210-5p	ONECUT2
MSTRG.13278.1	hsa-miR-216a-5p	KCTD16
MSTRG.17087.1	hsa-miR-34a-5p	TNR
MSTRG.22318.1	hsa-miR-4697-3p	WNT9A
MSTRG.25922.1	hsa-miR-508-5p	CD34
MSTRG.3036.7	hsa-miR-5698	SYT12
MSTRG.17087.1	hsa-miR-34a-5p	SLIT3
MSTRG.13280.1	hsa-miR-216a-3p	TNR
MSTRG.3150.1	hsa-miR-508-5p	GNAO1
MSTRG.13711.1	hsa-miR-450a-2-3p	PLEKHG4B
MSTRG.18315.1	hsa-miR-4758-3p	TNR
MSTRG.13278.1	hsa-miR-4758-3p	TNR
MSTRG.25922.1	hsa-miR-34a-5p	TNR
MSTRG.17118.1	hsa-miR-877-3p	GFOD1
MSTRG.25922.1	hsa-miR-877-5p	CD34
MSTRG.26440.2	hsa-miR-552-3p	ATP11A
MSTRG.5059.4	hsa-miR-210-5p	KSR2
MSTRG.13711.1	hsa-miR-31-5p	MAP3K13
MSTRG.10260.1	hsa-miR-331-3p	POFUT2
MSTRG.8730.1	hsa-miR-449b-5p	TMED3
ENST00000630242	hsa-miR-210-5p	KSR2
MSTRG.3624.3	hsa-miR-1226-3p	ADARB2
MSTRG.661.9	hsa-miR-296-3p	LMCD1
MSTRG.5059.2	hsa-miR-4446-3p	2021-09-03
MSTRG.10260.1	hsa-miR-508-5p	GNB1L
MSTRG.10260.1	hsa-miR-6815-5p	GNB1L
MSTRG.16201.1	hsa-miR-4443	GREM1
ENST00000630242	hsa-miR-877-3p	KIAA1644
ENST00000630242	hsa-miR-1269a	ATP11A
MSTRG.5059.4	hsa-miR-4758-3p	ADM2
MSTRG.1054.1	hsa-miR-34a-5p	TNR
MSTRG.22400.1	hsa-miR-654-5p	KCNK3
MSTRG.19035.1	hsa-miR-449b-5p	KCNK3
MSTRG.21350.4	hsa-miR-34a-5p	GREM1
MSTRG.10260.1	hsa-miR-6815-5p	GREM1
MSTRG.3624.3	hsa-miR-331-3p	MDGA1
MSTRG.12336.1	hsa-miR-365a-5p	CD34
ENST00000630242	hsa-miR-4443	SLC7A5
MSTRG.7995.1	hsa-miR-4446-3p	KIAA0513
MSTRG.2404.1	hsa-miR-34a-5p	GREM1
MSTRG.10260.1	hsa-miR-552-3p	ATP11A
MSTRG.661.9	hsa-miR-449b-5p	SLIT3
MSTRG.3150.1	hsa-miR-4446-3p	NECTIN1
MSTRG.20850.1	hsa-miR-4286	LMCD1
MSTRG.13278.1	hsa-miR-486-3p	CD34
MSTRG.1191.1	hsa-miR-508-5p	GFOD1
MSTRG.13511.1	hsa-miR-877-5p	CD34
MSTRG.18099.1	hsa-miR-3660	WNT9A
MSTRG.20417.1	hsa-miR-449b-5p	KCNK3
MSTRG.17108.1	hsa-miR-216a-3p	KCTD16
MSTRG.26440.2	hsa-miR-4446-3p	ADM2
MSTRG.16201.1	hsa-miR-3660	PLEKHG4B
MSTRG.16220.1	hsa-miR-6815-5p	MDGA1
MSTRG.16220.1	hsa-miR-5698	WNT9A
MSTRG.26440.2	hsa-miR-6782-3p	MAP3K9
MSTRG.22400.1	hsa-miR-296-3p	MDGA1
MSTRG.16201.1	hsa-miR-654-5p	FOSL2
MSTRG.13280.1	hsa-miR-449b-5p	MDGA1
MSTRG.1054.1	hsa-miR-4659b-3p	KCTD16
ENST00000623760	hsa-miR-486-3p	SOX11
MSTRG.10260.1	hsa-miR-508-5p	RAB11FIP4
MSTRG.1054.1	hsa-miR-6815-5p	MDGA1
MSTRG.10260.1	hsa-miR-708-5p	ADM2
MSTRG.5618.1	hsa-miR-4446-3p	GNB1L
MSTRG.18315.1	hsa-miR-205-5p	GFOD1
MSTRG.17118.1	hsa-miR-5698	WNT9A
MSTRG.17322.1	hsa-miR-92b-3p	GFOD1
MSTRG.17115.1	hsa-miR-34a-5p	SLIT3
MSTRG.13278.1	hsa-miR-514b-5p	KCTD16
MSTRG.17082.1	hsa-miR-6815-5p	SLIT3
MSTRG.16201.1	hsa-miR-4758-3p	FOSL2
MSTRG.4233.3	hsa-miR-216a-3p	ONECUT2
MSTRG.16201.1	hsa-miR-4758-3p	TMED3
ENST00000627566	hsa-miR-513c-5p	KCTD16
MSTRG.20417.1	hsa-miR-296-3p	TNR
MSTRG.10260.1	hsa-miR-654-5p	SBK1
MSTRG.26440.2	hsa-miR-345-5p	ADM2
MSTRG.5618.1	hsa-miR-4443	GREM1
MSTRG.22318.1	hsa-miR-210-5p	MDGA1
MSTRG.3150.1	hsa-miR-216a-5p	PDK1
MSTRG.20417.1	hsa-miR-4446-3p	TNS1
MSTRG.8730.1	hsa-miR-449a	TMED3
MSTRG.8730.1	hsa-miR-508-5p	STX1B
MSTRG.7995.1	hsa-miR-509-3-5p	TMEM184A
MSTRG.17118.1	hsa-miR-331-3p	CD34
MSTRG.18099.1	hsa-miR-34a-5p	SLIT3
MSTRG.3515.1	hsa-miR-5698	KCNK3
MSTRG.22400.1	hsa-miR-552-3p	CD34
MSTRG.16201.1	hsa-miR-4284	ADM2
MSTRG.13280.1	hsa-miR-34a-5p	KCNK3
MSTRG.10259.1	hsa-miR-216a-3p	GREM1
MSTRG.10260.1	hsa-miR-345-5p	KIAA1644
MSTRG.10260.1	hsa-miR-1269a	ATP11A
MSTRG.5618.1	hsa-miR-92b-3p	GNB1L
MSTRG.26440.2	hsa-miR-4446-3p	ATP11A
MSTRG.13280.1	hsa-miR-449a	KCNK3
MSTRG.5059.2	hsa-miR-486-3p	GOLGA7B
MSTRG.18315.1	hsa-miR-365a-5p	TNS1
MSTRG.16220.1	hsa-miR-216a-3p	TNR
MSTRG.1054.1	hsa-miR-4446-3p	WNT9A
ENST00000630242	hsa-miR-34a-5p	TMEM184A
MSTRG.661.9	hsa-miR-877-3p	CD34
MSTRG.13711.1	hsa-miR-6882-5p	MAP3K9
MSTRG.17082.1	hsa-miR-4758-3p	GFOD1
MSTRG.16201.1	hsa-miR-6815-5p	GREM1
MSTRG.13280.1	hsa-miR-449a	WNT9A
MSTRG.17087.1	hsa-miR-4446-3p	MDGA1
MSTRG.10259.1	hsa-miR-4758-3p	POFUT2
MSTRG.7694.1	hsa-miR-216a-3p	MAP3K9
MSTRG.661.9	hsa-miR-449a	SLIT3
MSTRG.25922.1	hsa-miR-508-5p	SLIT3
MSTRG.19035.1	hsa-miR-5698	SLIT3
MSTRG.10259.1	hsa-miR-4728-3p	KSR2
MSTRG.10260.1	hsa-miR-4284	ADM2
MSTRG.25036.2	hsa-miR-1226-3p	GFOD1
MSTRG.13511.1	hsa-miR-708-5p	GFOD1
MSTRG.25036.2	hsa-miR-135b-3p	ADARB2
MSTRG.25922.1	hsa-miR-514b-5p	ADARB2
MSTRG.3515.1	hsa-miR-508-5p	SLIT3
MSTRG.20417.1	hsa-miR-877-5p	KCTD16
MSTRG.16201.1	hsa-miR-654-5p	SBK1
MSTRG.22400.1	hsa-miR-34a-5p	KCNK3
MSTRG.16220.1	hsa-miR-449c-5p	SLIT3
MSTRG.26440.2	hsa-miR-6815-5p	ONECUT2
ENST00000630242	hsa-miR-1226-3p	MAP3K9
MSTRG.1054.1	hsa-miR-5698	WNT9A
MSTRG.1191.1	hsa-miR-4758-3p	TNR
ENST00000630242	hsa-miR-345-5p	PDK1
MSTRG.8730.1	hsa-miR-449b-5p	NECTIN1
MSTRG.16807.21	hsa-miR-6815-5p	WNT9A
MSTRG.16201.1	hsa-miR-4446-3p	TMED3
ENST00000617529	hsa-miR-4443	GREM1
MSTRG.2404.1	hsa-miR-5698	SOX11
MSTRG.7995.1	hsa-miR-4446-3p	ZC3H12D
MSTRG.7995.1	hsa-miR-4446-3p	PLEKHG4B
MSTRG.8730.1	hsa-miR-449c-5p	2021-09-03
MSTRG.22400.1	hsa-miR-508-5p	SLIT3
MSTRG.26440.2	hsa-miR-187-3p	KIAA1644
MSTRG.4233.3	hsa-miR-216a-3p	MAP3K9
MSTRG.13280.1	hsa-miR-4446-3p	MDGA1
MSTRG.17108.1	hsa-miR-449b-5p	MDGA1
MSTRG.13711.1	hsa-miR-4697-3p	TMEM184A
ENST00000617529	hsa-miR-6815-5p	KIAA1644
MSTRG.5059.2	hsa-miR-4446-3p	NECTIN1
MSTRG.4233.3	hsa-miR-4281	SBK1
MSTRG.17108.1	hsa-miR-708-5p	MDGA1
MSTRG.5059.4	hsa-miR-4446-3p	2021-09-03
MSTRG.17087.1	hsa-miR-331-3p	MDGA1
MSTRG.10259.1	hsa-miR-4697-3p	SYT12
MSTRG.17118.1	hsa-miR-331-3p	MDGA1
MSTRG.20417.1	hsa-miR-486-3p	CD34
MSTRG.4233.3	hsa-miR-2682-5p	LIF
MSTRG.18099.1	hsa-miR-4652-5p	CD34
ENST00000441095	hsa-miR-508-5p	GNB1L
MSTRG.17118.1	hsa-miR-4728-3p	GFOD1
ENST00000630242	hsa-miR-486-3p	SLC7A5
MSTRG.10259.1	hsa-miR-449c-5p	FOSL2
MSTRG.10260.1	hsa-miR-508-5p	ONECUT2
MSTRG.5059.4	hsa-miR-1264	SLC7A5
MSTRG.2404.1	hsa-miR-449a	GOLGA7B
MSTRG.19035.1	hsa-miR-6815-5p	TNS1
MSTRG.26440.2	hsa-miR-449a	2021-09-03
MSTRG.3150.1	hsa-miR-449a	2021-09-03
MSTRG.26440.2	hsa-miR-1226-3p	KIAA1644
MSTRG.661.9	hsa-miR-4284	KCNK3
ENST00000630242	hsa-miR-331-3p	NECTIN1
MSTRG.7995.1	hsa-miR-509-3-5p	PDK1
MSTRG.16201.1	hsa-miR-486-3p	SBK1
MSTRG.1191.1	hsa-miR-509-5p	WNT9A
MSTRG.13711.1	hsa-miR-509-3-5p	MAP3K13
MSTRG.18099.1	hsa-miR-449b-5p	KCNK3
MSTRG.7694.1	hsa-miR-345-5p	ONECUT2
ENST00000630242	hsa-miR-486-3p	LIF
MSTRG.17118.1	hsa-miR-4758-3p	MDGA1
MSTRG.7694.1	hsa-miR-216a-3p	SBK1
MSTRG.17118.1	hsa-miR-5698	SLIT3
ENST00000630242	hsa-miR-1226-3p	ONECUT2
MSTRG.8730.1	hsa-miR-6815-5p	NECTIN1
MSTRG.17108.1	hsa-miR-486-3p	WNT9A
MSTRG.22400.1	hsa-miR-365a-5p	CD34
MSTRG.17087.1	hsa-miR-877-3p	TNR
MSTRG.10260.1	hsa-miR-6882-5p	MAP3K9
MSTRG.3515.1	hsa-miR-514b-5p	KCTD16
MSTRG.7995.1	hsa-miR-4758-3p	ONECUT2
ENST00000617529	hsa-miR-4446-3p	ADM2
MSTRG.12336.1	hsa-miR-514a-5p	MDGA1
MSTRG.20417.1	hsa-miR-34a-5p	TNR
MSTRG.20850.1	hsa-miR-877-3p	SLIT3
MSTRG.17322.1	hsa-miR-877-5p	KCTD16
MSTRG.22400.1	hsa-miR-216a-5p	SLIT3
MSTRG.5059.4	hsa-miR-4758-3p	SYT12
MSTRG.26440.2	hsa-miR-6815-5p	NECTIN1
MSTRG.26440.2	hsa-miR-216a-3p	GNB1L
MSTRG.7995.1	hsa-miR-4758-3p	GOLGA7B
MSTRG.1054.1	hsa-miR-365a-5p	CD34
ENST00000630242	hsa-miR-486-3p	STX1B
MSTRG.661.9	hsa-miR-877-5p	KCNK3
MSTRG.18315.1	hsa-miR-4758-3p	GFOD1
MSTRG.7995.1	hsa-miR-508-5p	GNB1L
MSTRG.13278.1	hsa-miR-486-3p	WNT9A
MSTRG.13711.1	hsa-miR-6882-5p	MAP3K13
MSTRG.3624.3	hsa-miR-4286	CD34
MSTRG.10260.1	hsa-miR-135a-5p	NECTIN1
MSTRG.10259.1	hsa-miR-216a-3p	MAP3K9
MSTRG.8730.1	hsa-miR-210-5p	POFUT2
MSTRG.25922.1	hsa-miR-449c-5p	GFOD1
MSTRG.19035.1	hsa-miR-5698	CD34
MSTRG.13280.1	hsa-miR-449a	SLIT3
MSTRG.1054.1	hsa-miR-449b-5p	MDGA1
MSTRG.13711.1	hsa-miR-449b-5p	2021-09-03
MSTRG.3150.1	hsa-miR-205-5p	ADM2
MSTRG.25922.1	hsa-miR-34a-5p	KCTD16
ENST00000630242	hsa-miR-4446-3p	SBK1
MSTRG.17115.1	hsa-miR-296-3p	CD34
MSTRG.4233.3	hsa-miR-508-5p	KIAA0513
MSTRG.16807.21	hsa-miR-514b-5p	ADARB2
MSTRG.26440.2	hsa-miR-513c-5p	GNB1L
MSTRG.18315.1	hsa-miR-508-5p	CD34
MSTRG.16201.1	hsa-miR-449c-5p	TMEM184A
MSTRG.17087.1	hsa-miR-296-3p	WNT9A
MSTRG.16201.1	hsa-miR-296-3p	ADM2
MSTRG.3036.7	hsa-miR-216a-3p	ONECUT2
MSTRG.16201.1	hsa-miR-1226-3p	ONECUT2
ENST00000630242	hsa-miR-1269b	PDK1
MSTRG.13278.1	hsa-miR-365a-5p	TNS1
MSTRG.7694.1	hsa-miR-210-5p	GNAO1
MSTRG.16807.21	hsa-miR-449b-5p	MDGA1
MSTRG.13278.1	hsa-miR-4758-3p	MDGA1
MSTRG.10259.1	hsa-miR-424-5p	ONECUT2
ENST00000630242	hsa-miR-4446-3p	2021-09-03
MSTRG.26440.2	hsa-miR-4446-3p	ONECUT2
MSTRG.5059.4	hsa-miR-345-5p	ADM2
MSTRG.19037.1	hsa-miR-4443	TNS1
MSTRG.10260.1	hsa-miR-708-5p	LIF
ENST00000630242	hsa-miR-365a-5p	GREM1
MSTRG.17108.1	hsa-miR-642a-3p	ADARB2
MSTRG.1191.1	hsa-miR-4286	GFOD1
MSTRG.5618.1	hsa-miR-4758-3p	KIAA0513
MSTRG.3150.1	hsa-miR-508-5p	ZC3H12D
MSTRG.3624.3	hsa-miR-34a-5p	SLIT3
MSTRG.20850.1	hsa-miR-296-3p	WNT9A
MSTRG.25922.1	hsa-miR-508-5p	GFOD1
MSTRG.1054.1	hsa-miR-365a-5p	MDGA1
MSTRG.7995.1	hsa-miR-4758-3p	TMED3
MSTRG.17082.1	hsa-miR-508-5p	GFOD1
MSTRG.17115.1	hsa-miR-365a-5p	TNS1
MSTRG.22400.1	hsa-miR-4433b-5p	ADARB2
MSTRG.19035.1	hsa-miR-6815-5p	SLIT3
MSTRG.5618.1	hsa-miR-365a-5p	ATP11A
MSTRG.5059.2	hsa-miR-4446-3p	ZC3H12D
MSTRG.4233.3	hsa-miR-216a-3p	SBK1
MSTRG.16201.1	hsa-miR-2682-5p	FOSL2
MSTRG.16220.1	hsa-miR-296-3p	CD34
MSTRG.26440.2	hsa-miR-449b-5p	PLAC4
MSTRG.10259.1	hsa-miR-296-3p	SYT12
MSTRG.17087.1	hsa-miR-34a-5p	KCTD16
MSTRG.25922.1	hsa-miR-449c-5p	KCTD16
MSTRG.18315.1	hsa-miR-877-3p	CD34
MSTRG.17087.1	hsa-miR-509-5p	ADARB2
MSTRG.1191.1	hsa-miR-449b-5p	MDGA1
MSTRG.16201.1	hsa-miR-210-5p	KSR2
MSTRG.21350.4	hsa-miR-216a-5p	GOLGA7B
ENST00000623760	hsa-miR-216a-3p	SYT16
MSTRG.13511.1	hsa-miR-508-5p	SLIT3
MSTRG.17087.1	hsa-miR-345-5p	TNS1
MSTRG.17118.1	hsa-miR-6882-5p	KCTD16
MSTRG.7995.1	hsa-miR-508-5p	PDK1
MSTRG.17322.1	hsa-miR-331-3p	GFOD1
MSTRG.18099.1	hsa-miR-449c-5p	TNR
MSTRG.7995.1	hsa-miR-431-5p	TMED3
MSTRG.13278.1	hsa-miR-877-5p	CD34
MSTRG.17087.1	hsa-miR-1269b	LMCD1
ENST00000627566	hsa-miR-486-3p	KCNK3
MSTRG.5059.2	hsa-miR-4446-3p	RAB11FIP4
MSTRG.18099.1	hsa-miR-205-5p	GFOD1
MSTRG.10260.1	hsa-miR-92b-5p	PLAC4
MSTRG.18099.1	hsa-miR-205-5p	SLIT3
MSTRG.12336.1	hsa-miR-365a-5p	MDGA1
ENST00000617529	hsa-miR-296-3p	ADM2
MSTRG.1191.1	hsa-miR-365a-5p	KCNK3
MSTRG.17108.1	hsa-miR-365a-5p	CD34
MSTRG.10260.1	hsa-miR-1226-3p	POFUT2
MSTRG.5059.4	hsa-miR-92b-3p	CACNA1I
MSTRG.26440.2	hsa-miR-1269b	LIF
MSTRG.7694.1	hsa-miR-210-5p	KSR2
MSTRG.10260.1	hsa-miR-135a-5p	TMED3
MSTRG.22318.1	hsa-miR-4284	GFOD1
MSTRG.10260.1	hsa-miR-486-3p	SLC7A5
MSTRG.22400.1	hsa-miR-514b-5p	ADARB2
MSTRG.18315.1	hsa-miR-449b-5p	SLIT3
MSTRG.21350.4	hsa-miR-345-5p	GOLGA7B
MSTRG.16807.21	hsa-miR-449b-5p	WNT9A
MSTRG.12336.1	hsa-miR-877-3p	GFOD1
MSTRG.13278.1	hsa-miR-212-3p	KCNK3
MSTRG.20417.1	hsa-miR-1269b	TNR
MSTRG.8730.1	hsa-miR-34a-5p	SRCIN1
ENST00000630242	hsa-miR-1269a	PDK1
MSTRG.13280.1	hsa-miR-642a-3p	ADARB2
MSTRG.5618.1	hsa-miR-1269b	PDK1
MSTRG.10259.1	hsa-miR-508-5p	FOSL2
MSTRG.3624.3	hsa-miR-92b-5p	ADARB2
ENST00000627566	hsa-miR-296-3p	TNR
ENST00000630242	hsa-miR-4446-3p	ONECUT2
MSTRG.10260.1	hsa-miR-552-3p	SRCIN1
MSTRG.4233.3	hsa-miR-508-5p	GNB1L
MSTRG.21350.4	hsa-miR-5698	KIAA1644
MSTRG.25922.1	hsa-miR-4446-3p	KCNK3
MSTRG.17118.1	hsa-miR-4446-3p	WNT9A
MSTRG.26440.2	hsa-miR-431-5p	RAB11FIP4
MSTRG.13711.1	hsa-miR-4446-3p	SBK1
MSTRG.7995.1	hsa-miR-216a-3p	KSR2
MSTRG.3515.1	hsa-miR-5698	CD34
ENST00000623760	hsa-miR-4443	ZC3H12D
MSTRG.16807.21	hsa-miR-4652-5p	CD34
MSTRG.18099.1	hsa-miR-514a-5p	MDGA1
MSTRG.20850.1	hsa-miR-4446-3p	KCNK3
MSTRG.10259.1	hsa-miR-21-3p	NECTIN1
MSTRG.13278.1	hsa-miR-449a	KCNK3
MSTRG.1191.1	hsa-miR-508-5p	TNR
MSTRG.12336.1	hsa-miR-205-5p	GFOD1
MSTRG.26440.2	hsa-miR-187-3p	KSR2
MSTRG.7995.1	hsa-miR-210-5p	TMEM184A
MSTRG.17082.1	hsa-miR-216a-3p	TNR
MSTRG.5618.1	hsa-miR-4758-3p	POFUT2
MSTRG.1054.1	hsa-miR-1226-3p	MDGA1
ENST00000630242	hsa-miR-449c-5p	MAP3K9
MSTRG.22400.1	hsa-miR-1269b	LMCD1
MSTRG.13511.1	hsa-miR-449a	SLIT3
ENST00000627566	hsa-miR-296-3p	WNT9A
MSTRG.18099.1	hsa-miR-516b-5p	GFOD1
ENST00000623760	hsa-miR-4443	MAP3K13
MSTRG.16807.21	hsa-miR-449b-5p	KCNK3
MSTRG.25922.1	hsa-miR-449c-5p	SLIT3
MSTRG.20850.1	hsa-miR-216a-3p	CD34
MSTRG.3515.1	hsa-miR-34a-5p	WNT9A
MSTRG.17108.1	hsa-miR-216a-5p	KCTD16
MSTRG.17087.1	hsa-miR-216a-3p	TNR
MSTRG.25922.1	hsa-miR-5698	SLIT3
MSTRG.17087.1	hsa-miR-5698	KCNK3
MSTRG.13278.1	hsa-miR-4433b-5p	LMCD1
MSTRG.25036.2	hsa-miR-449c-5p	KCTD16
MSTRG.16201.1	hsa-miR-486-3p	PLEKHG4B
ENST00000441095	hsa-miR-503-5p	POFUT2
MSTRG.8730.1	hsa-miR-508-5p	GNB1L
MSTRG.4233.3	hsa-miR-6815-5p	BMF
MSTRG.17118.1	hsa-miR-449c-5p	KCNK3
MSTRG.22400.1	hsa-miR-4446-3p	MDGA1
MSTRG.3624.3	hsa-miR-486-3p	WNT9A
MSTRG.13711.1	hsa-miR-187-3p	EPHB2
MSTRG.5059.4	hsa-miR-4446-3p	NECTIN1
MSTRG.3624.3	hsa-miR-449c-5p	KCTD16
MSTRG.19035.1	hsa-miR-34a-5p	KCTD16
MSTRG.3036.7	hsa-miR-513c-5p	OPRD1
MSTRG.13711.1	hsa-miR-4443	GREM1
ENST00000441095	hsa-miR-5698	STX1B
MSTRG.17082.1	hsa-miR-34a-5p	KCNK3
MSTRG.19037.1	hsa-miR-516b-5p	KCNK3
MSTRG.10259.1	hsa-miR-449b-3p	OPRD1
MSTRG.16201.1	hsa-miR-508-5p	ONECUT2
ENST00000630242	hsa-miR-345-5p	GOLGA7B
MSTRG.5059.4	hsa-miR-4758-3p	GOLGA7B
MSTRG.5059.2	hsa-miR-345-5p	KIAA1644
MSTRG.26440.2	hsa-miR-331-3p	SRCIN1
MSTRG.3150.1	hsa-miR-449c-5p	KIF1A
MSTRG.10260.1	hsa-miR-6815-5p	SBK1
MSTRG.13711.1	hsa-miR-187-3p	MAP3K9
MSTRG.26440.2	hsa-miR-34a-5p	SRCIN1
MSTRG.16201.1	hsa-miR-4758-3p	KIAA0513
MSTRG.4233.3	hsa-miR-514a-5p	KSR2
MSTRG.17322.1	hsa-miR-2682-5p	SLIT3
MSTRG.18315.1	hsa-miR-6815-5p	MDGA1
MSTRG.19168.1	hsa-miR-365a-5p	FOSL2
MSTRG.10259.1	hsa-miR-34a-5p	NECTIN1
MSTRG.17322.1	hsa-miR-486-3p	LMCD1
MSTRG.25922.1	hsa-miR-486-3p	WNT9A
MSTRG.25036.2	hsa-miR-4433b-5p	ADARB2
MSTRG.26440.2	hsa-miR-216a-3p	RAB11FIP4
ENST00000441095	hsa-miR-449a	2021-09-03
MSTRG.5059.2	hsa-miR-216a-3p	GREM1
MSTRG.13711.1	hsa-miR-31-5p	OPRD1
MSTRG.26440.2	hsa-miR-365a-5p	GREM1
MSTRG.13280.1	hsa-miR-449c-5p	GFOD1
MSTRG.7694.1	hsa-miR-331-3p	NECTIN1
MSTRG.18099.1	hsa-miR-216a-3p	CD34
ENST00000623760	hsa-miR-449c-5p	TMEM184A
MSTRG.10259.1	hsa-miR-34a-5p	SRCIN1
MSTRG.13511.1	hsa-miR-449b-5p	WNT9A
MSTRG.19035.1	hsa-miR-212-3p	KCNK3
MSTRG.16201.1	hsa-miR-1269a	PDK1
MSTRG.5618.1	hsa-miR-4758-3p	TMED3
MSTRG.5059.2	hsa-miR-345-5p	ZC3H12D
MSTRG.3515.1	hsa-miR-34a-5p	KCTD16
MSTRG.19168.1	hsa-miR-216a-3p	KCNN3
MSTRG.7694.1	hsa-miR-486-3p	LIF
MSTRG.10259.1	hsa-miR-6815-5p	POFUT2
MSTRG.19037.1	hsa-miR-210-5p	MDGA1
MSTRG.13280.1	hsa-miR-5698	CD34
ENST00000630242	hsa-miR-486-3p	GOLGA7B
MSTRG.19035.1	hsa-miR-4758-3p	LMCD1
MSTRG.1054.1	hsa-miR-4446-3p	SLIT3
MSTRG.22400.1	hsa-miR-331-3p	MDGA1
MSTRG.3036.7	hsa-miR-449a	2021-09-03
MSTRG.13280.1	hsa-miR-486-3p	LMCD1
MSTRG.16201.1	hsa-miR-4697-5p	TMEM184A
MSTRG.13511.1	hsa-miR-296-3p	LMCD1
MSTRG.19035.1	hsa-miR-331-3p	GFOD1
MSTRG.20417.1	hsa-miR-877-3p	SLIT3
MSTRG.26440.2	hsa-miR-449a	GNB1L
MSTRG.7694.1	hsa-miR-216a-3p	ONECUT2
MSTRG.17087.1	hsa-miR-513c-5p	KCTD16
MSTRG.3624.3	hsa-miR-2682-5p	SLIT3
MSTRG.10260.1	hsa-miR-486-3p	LIF
MSTRG.19035.1	hsa-miR-508-5p	SLIT3
MSTRG.5618.1	hsa-miR-514a-5p	KSR2
MSTRG.17115.1	hsa-miR-296-3p	ADARB2
MSTRG.2404.1	hsa-miR-5698	OPRD1
MSTRG.13280.1	hsa-miR-1226-3p	MDGA1
MSTRG.13278.1	hsa-miR-516b-5p	GFOD1
MSTRG.17322.1	hsa-miR-216a-3p	KCTD16
MSTRG.13511.1	hsa-miR-4443	TNS1
MSTRG.1191.1	hsa-miR-4286	MDGA1
MSTRG.22318.1	hsa-miR-216a-3p	LMCD1
MSTRG.10260.1	hsa-miR-486-3p	RAB11FIP4
ENST00000630242	hsa-miR-365a-5p	ONECUT2
MSTRG.10259.1	hsa-miR-4758-3p	TMED3
MSTRG.4233.3	hsa-miR-6815-5p	ONECUT2
MSTRG.18315.1	hsa-miR-34a-5p	GFOD1
MSTRG.17115.1	hsa-miR-877-3p	TNR
MSTRG.5059.4	hsa-miR-513c-5p	GNB1L
MSTRG.21350.4	hsa-miR-877-3p	KIAA1644
MSTRG.22318.1	hsa-miR-331-3p	TNS1
MSTRG.22400.1	hsa-miR-216a-3p	KCTD16
MSTRG.25922.1	hsa-miR-449c-5p	KCNK3
MSTRG.1054.1	hsa-miR-1269a	LMCD1
MSTRG.25036.2	hsa-miR-877-3p	TNR
MSTRG.18099.1	hsa-miR-216a-3p	KCTD16
MSTRG.17108.1	hsa-miR-708-5p	GFOD1
MSTRG.3624.3	hsa-miR-449c-5p	TNR
MSTRG.17082.1	hsa-miR-4728-3p	MDGA1
MSTRG.13511.1	hsa-miR-509-5p	WNT9A
ENST00000441095	hsa-miR-6815-5p	POFUT2
MSTRG.8730.1	hsa-miR-449b-5p	GNB1L
ENST00000630242	hsa-miR-2682-5p	2021-09-03
MSTRG.5059.2	hsa-miR-4433b-5p	POFUT2
MSTRG.13278.1	hsa-miR-449c-5p	KCNK3
MSTRG.3036.7	hsa-miR-6815-5p	SBK1
MSTRG.5618.1	hsa-miR-4697-3p	SYT12
MSTRG.3036.7	hsa-miR-486-3p	FOSL2
MSTRG.20417.1	hsa-miR-4446-3p	MDGA1
MSTRG.4233.3	hsa-miR-486-3p	STX1B
ENST00000627566	hsa-miR-424-5p	KCNK3
MSTRG.16201.1	hsa-miR-4286	2021-09-03
MSTRG.10259.1	hsa-miR-34a-5p	ADM2
MSTRG.26440.2	hsa-miR-708-3p	PLAC4
MSTRG.13511.1	hsa-miR-365a-5p	LMCD1
MSTRG.17108.1	hsa-miR-449c-5p	KCNK3
MSTRG.16201.1	hsa-miR-2682-5p	TMEM184A
MSTRG.3150.1	hsa-miR-6815-5p	GREM1
MSTRG.16201.1	hsa-miR-4446-3p	OPRD1
MSTRG.7694.1	hsa-miR-508-5p	RAB11FIP4
MSTRG.21350.4	hsa-miR-4443	ZC3H12D
MSTRG.3515.1	hsa-miR-34a-5p	MDGA1
MSTRG.16220.1	hsa-miR-4446-3p	WNT9A
MSTRG.16201.1	hsa-miR-449b-5p	PLEKHG4B
MSTRG.661.9	hsa-miR-210-3p	MDGA1
MSTRG.17118.1	hsa-miR-4446-3p	KCNK3
MSTRG.5059.2	hsa-miR-877-3p	TMED3
MSTRG.12336.1	hsa-miR-205-5p	SLIT3
ENST00000441095	hsa-miR-508-5p	RAB11FIP4
MSTRG.17108.1	hsa-miR-5698	SLIT3
MSTRG.13280.1	hsa-miR-449c-5p	SLIT3
ENST00000617529	hsa-miR-708-5p	SLC7A5
MSTRG.8730.1	hsa-miR-508-5p	KIAA0513
MSTRG.22400.1	hsa-miR-514b-5p	KCTD16
MSTRG.13278.1	hsa-miR-4652-5p	LMCD1
MSTRG.13278.1	hsa-miR-210-5p	MDGA1
MSTRG.26440.2	hsa-miR-654-5p	ATP11A
ENST00000630242	hsa-miR-216a-3p	MAP3K13
MSTRG.25922.1	hsa-miR-4446-3p	SLIT3
ENST00000630242	hsa-miR-331-3p	GOLGA7B
MSTRG.18099.1	hsa-miR-6815-5p	CD34
MSTRG.17108.1	hsa-miR-182-5p	TNR
MSTRG.17087.1	hsa-miR-664b-3p	CD34
MSTRG.17118.1	hsa-miR-509-3-5p	WNT9A
MSTRG.22400.1	hsa-miR-449b-5p	WNT9A
MSTRG.13511.1	hsa-miR-449a	KCNK3
MSTRG.13711.1	hsa-miR-2682-5p	FOSL2
MSTRG.26440.2	hsa-miR-5698	TMED3
MSTRG.10259.1	hsa-miR-6815-5p	SBK1
MSTRG.16201.1	hsa-miR-449b-5p	TMED3
MSTRG.25922.1	hsa-miR-296-3p	TNR
MSTRG.8730.1	hsa-miR-135b-5p	TMED3
MSTRG.17118.1	hsa-miR-4446-3p	SLIT3
MSTRG.26440.2	hsa-miR-449b-5p	TMED3
MSTRG.13511.1	hsa-miR-216a-3p	LMCD1
MSTRG.13280.1	hsa-miR-508-5p	CD34
MSTRG.3036.7	hsa-miR-5698	STX1B
MSTRG.17082.1	hsa-miR-34a-5p	WNT9A
MSTRG.18099.1	hsa-miR-365a-5p	MDGA1
MSTRG.5618.1	hsa-miR-4446-3p	ONECUT2
MSTRG.16807.21	hsa-miR-877-5p	CD34
ENST00000630242	hsa-miR-331-3p	GREM1
MSTRG.20850.1	hsa-miR-508-5p	SLIT3
MSTRG.26440.2	hsa-miR-449a	ADM2
MSTRG.22318.1	hsa-miR-508-5p	GFOD1
MSTRG.13507.1	hsa-miR-1226-3p	GFOD1
MSTRG.16201.1	hsa-miR-148a-5p	OPRD1
MSTRG.10259.1	hsa-miR-877-3p	SYT12
MSTRG.26440.2	hsa-miR-4446-3p	TMED3
MSTRG.22318.1	hsa-miR-4758-3p	LMCD1
MSTRG.17118.1	hsa-miR-4652-5p	LMCD1
MSTRG.1054.1	hsa-miR-216a-5p	SLIT3
MSTRG.25922.1	hsa-miR-508-5p	TNR
MSTRG.17108.1	hsa-miR-449b-5p	WNT9A
MSTRG.17322.1	hsa-miR-449c-5p	KCTD16
MSTRG.22400.1	hsa-miR-365a-5p	TNS1
MSTRG.10259.1	hsa-miR-216a-3p	RAB11FIP4
MSTRG.661.9	hsa-miR-877-3p	SLIT3
MSTRG.3624.3	hsa-miR-4758-3p	GFOD1
MSTRG.16201.1	hsa-miR-486-3p	SOX11
MSTRG.13511.1	hsa-miR-877-5p	KCTD16
MSTRG.20850.1	hsa-miR-216a-3p	KCTD16
MSTRG.20417.1	hsa-miR-449b-5p	MDGA1
MSTRG.13278.1	hsa-miR-296-3p	TNR
MSTRG.18099.1	hsa-miR-5698	WNT9A
MSTRG.5059.2	hsa-miR-345-5p	ONECUT2
MSTRG.19168.1	hsa-miR-216a-3p	SYT16
MSTRG.25922.1	hsa-miR-654-5p	KCNK3
MSTRG.13507.1	hsa-miR-1269b	LMCD1
MSTRG.25922.1	hsa-miR-449a	SLIT3
MSTRG.8730.1	hsa-miR-6815-5p	SBK1
MSTRG.13511.1	hsa-miR-217	WNT9A
MSTRG.16220.1	hsa-miR-31-5p	CD34
MSTRG.10259.1	hsa-miR-4446-3p	2021-09-03
MSTRG.20850.1	hsa-miR-552-3p	CD34
MSTRG.17115.1	hsa-miR-296-3p	MDGA1
MSTRG.16201.1	hsa-miR-5698	SYT12
MSTRG.4233.3	hsa-miR-486-3p	SBK1
MSTRG.17108.1	hsa-miR-5698	WNT9A
MSTRG.5059.2	hsa-miR-1226-3p	KIAA1644
MSTRG.19035.1	hsa-miR-449b-5p	SLIT3
ENST00000630242	hsa-miR-216a-3p	SLC7A5
MSTRG.13511.1	hsa-miR-296-3p	TNR
MSTRG.13278.1	hsa-miR-508-5p	SLIT3
MSTRG.17115.1	hsa-miR-365a-5p	LMCD1
MSTRG.22400.1	hsa-miR-449c-5p	KCTD16
MSTRG.13278.1	hsa-miR-34a-5p	WNT9A
MSTRG.10260.1	hsa-miR-216a-3p	GREM1
ENST00000441095	hsa-miR-449a	NECTIN1
MSTRG.13280.1	hsa-miR-877-5p	KCNK3
MSTRG.5059.2	hsa-miR-4446-3p	ONECUT2
MSTRG.20850.1	hsa-miR-296-3p	CD34
MSTRG.21350.4	hsa-miR-224-5p	GOLGA7B
MSTRG.21350.4	hsa-miR-296-3p	SYT12
MSTRG.13278.1	hsa-miR-6815-5p	MDGA1
MSTRG.661.9	hsa-miR-449a	WNT9A
MSTRG.16220.1	hsa-miR-1226-3p	ADARB2
MSTRG.3036.7	hsa-miR-449b-5p	GOLGA7B
MSTRG.5618.1	hsa-miR-1269a	LIF
MSTRG.22400.1	hsa-miR-516b-5p	KCNK3
MSTRG.3036.7	hsa-miR-216a-3p	GREM1
MSTRG.1191.1	hsa-miR-34a-5p	GFOD1
MSTRG.19168.1	hsa-miR-4758-3p	ADM2
MSTRG.5059.4	hsa-miR-4758-3p	KSR2
MSTRG.19168.1	hsa-miR-509-3-5p	SYT16
MSTRG.2404.1	hsa-miR-551a	TMED3
MSTRG.16220.1	hsa-miR-4446-3p	MDGA1
MSTRG.1191.1	hsa-miR-365a-5p	CD34
MSTRG.7694.1	hsa-miR-486-3p	STX1B
MSTRG.22400.1	hsa-miR-34a-5p	WNT9A
MSTRG.5059.2	hsa-miR-5698	KIAA1644
MSTRG.2404.1	hsa-miR-449a	PLEKHG4B
ENST00000441095	hsa-miR-4446-3p	RAB11FIP4
MSTRG.26440.2	hsa-miR-92b-3p	GNB1L
MSTRG.1191.1	hsa-miR-4286	LMCD1
MSTRG.20850.1	hsa-miR-5698	KCNK3
MSTRG.13278.1	hsa-miR-365a-5p	KCNK3
MSTRG.16220.1	hsa-miR-6815-5p	KCTD16
MSTRG.25922.1	hsa-miR-4443	SLIT3
MSTRG.16807.21	hsa-miR-877-3p	GFOD1
MSTRG.4233.3	hsa-miR-5698	TMED3
MSTRG.2404.1	hsa-miR-135a-5p	TMED3
MSTRG.16220.1	hsa-miR-5698	SLIT3
MSTRG.13278.1	hsa-miR-449c-5p	GFOD1
MSTRG.661.9	hsa-miR-365a-5p	KCNK3
MSTRG.10260.1	hsa-miR-552-3p	STX1B
MSTRG.22318.1	hsa-miR-216a-3p	KCTD16
MSTRG.16201.1	hsa-miR-508-5p	FOSL2
MSTRG.18315.1	hsa-miR-6815-5p	CD34
MSTRG.12336.1	hsa-miR-216b-5p	ADARB2
MSTRG.7995.1	hsa-miR-216a-3p	GREM1
MSTRG.3624.3	hsa-miR-486-3p	CD34
MSTRG.19037.1	hsa-miR-1226-3p	ADARB2
MSTRG.5059.2	hsa-miR-4446-3p	TMED3
ENST00000630242	hsa-miR-5698	GNAO1
MSTRG.4233.3	hsa-miR-5698	STX1B
MSTRG.5618.1	hsa-miR-508-5p	KSR2
MSTRG.5618.1	hsa-miR-4758-3p	RAB11FIP4
MSTRG.5618.1	hsa-miR-509-3-5p	GOLGA7B
MSTRG.7995.1	hsa-miR-4446-3p	2021-09-03
MSTRG.10260.1	hsa-miR-4443	KSR2
MSTRG.26440.2	hsa-miR-615-3p	ADM2
MSTRG.661.9	hsa-miR-4443	CD34
MSTRG.17108.1	hsa-miR-1226-3p	ADARB2
MSTRG.10259.1	hsa-miR-4446-3p	ADM2
MSTRG.16201.1	hsa-miR-449c-5p	PLEKHG4B
MSTRG.3150.1	hsa-miR-1226-3p	EPHB2
MSTRG.17115.1	hsa-miR-508-5p	GFOD1
MSTRG.5059.4	hsa-miR-4758-3p	KIAA0513
MSTRG.16807.21	hsa-miR-509-5p	ADARB2
MSTRG.17115.1	hsa-miR-210-3p	MDGA1
ENST00000627566	hsa-miR-708-5p	GFOD1
MSTRG.5618.1	hsa-miR-4728-3p	KSR2
MSTRG.18099.1	hsa-miR-6815-5p	SLIT3
MSTRG.13278.1	hsa-miR-212-3p	CD34
MSTRG.3150.1	hsa-miR-296-3p	ADM2
MSTRG.22400.1	hsa-miR-216a-3p	TNR
MSTRG.4233.3	hsa-miR-486-3p	SLC7A5
MSTRG.10260.1	hsa-miR-331-3p	NECTIN1
MSTRG.5059.2	hsa-miR-1269b	LIF
MSTRG.17108.1	hsa-miR-216a-5p	SLIT3
MSTRG.16220.1	hsa-miR-424-5p	KCNK3
MSTRG.2404.1	hsa-miR-449b-5p	TMED3
ENST00000627566	hsa-miR-486-3p	LMCD1
MSTRG.17087.1	hsa-miR-182-5p	TNR
MSTRG.13278.1	hsa-miR-331-3p	TNS1
ENST00000441095	hsa-miR-449c-5p	GNB1L
MSTRG.16201.1	hsa-miR-509-3-5p	GOLGA7B
MSTRG.10259.1	hsa-miR-449c-5p	2021-09-03
MSTRG.1054.1	hsa-miR-877-3p	SLIT3
MSTRG.13280.1	hsa-miR-4443	TNS1
MSTRG.25922.1	hsa-miR-514b-5p	KCTD16
MSTRG.3624.3	hsa-miR-331-3p	GFOD1
MSTRG.17115.1	hsa-miR-34a-5p	WNT9A
MSTRG.26440.2	hsa-miR-6815-5p	KIAA0513
MSTRG.5059.2	hsa-miR-877-3p	SYT12
MSTRG.19035.1	hsa-miR-34a-5p	WNT9A
MSTRG.10260.1	hsa-miR-1226-3p	CACNA1I
MSTRG.16201.1	hsa-miR-216a-3p	SYT12
MSTRG.5059.4	hsa-miR-4758-3p	POFUT2
ENST00000630242	hsa-miR-210-5p	CACNA1I
MSTRG.25922.1	hsa-miR-486-3p	KCNK3
MSTRG.3036.7	hsa-miR-514a-5p	PLEKHG4B
MSTRG.7995.1	hsa-miR-4758-3p	KSR2
MSTRG.3624.3	hsa-miR-508-5p	CD34
MSTRG.5059.4	hsa-miR-4697-3p	GNAO1
MSTRG.20417.1	hsa-miR-34a-5p	MDGA1
MSTRG.5618.1	hsa-miR-135b-5p	NECTIN1
MSTRG.4233.3	hsa-miR-5698	KIAA1644
MSTRG.22318.1	hsa-miR-4446-3p	WNT9A
MSTRG.18315.1	hsa-miR-449b-5p	KCNK3
MSTRG.3624.3	hsa-miR-449c-5p	KCNK3
ENST00000630242	hsa-miR-5698	TMEM184A
ENST00000630242	hsa-miR-216a-3p	SYT16
MSTRG.18315.1	hsa-miR-365a-5p	MDGA1
MSTRG.17118.1	hsa-miR-4446-3p	TNS1
MSTRG.13507.1	hsa-miR-296-3p	LMCD1
ENST00000441095	hsa-miR-375	ATP11A
MSTRG.16807.21	hsa-miR-449c-5p	GFOD1
MSTRG.3515.1	hsa-miR-92b-3p	GFOD1
MSTRG.10260.1	hsa-miR-4446-3p	KIAA0513
MSTRG.12336.1	hsa-miR-4728-3p	GFOD1
ENST00000630242	hsa-miR-877-3p	CACNA1I
MSTRG.13280.1	hsa-miR-486-3p	WNT9A
MSTRG.17087.1	hsa-miR-877-5p	KCNK3
MSTRG.17115.1	hsa-miR-508-5p	CD34
MSTRG.10260.1	hsa-miR-34a-5p	NECTIN1
MSTRG.19035.1	hsa-miR-513c-5p	CD34
MSTRG.22318.1	hsa-miR-654-5p	KCNK3
MSTRG.12336.1	hsa-miR-216a-3p	LMCD1
MSTRG.10260.1	hsa-miR-4758-3p	KIAA0513
ENST00000623760	hsa-miR-2682-5p	TMEM184A
MSTRG.26440.2	hsa-miR-1226-3p	ONECUT2
MSTRG.25922.1	hsa-miR-5698	CD34
ENST00000623760	hsa-miR-365a-5p	GREM1
MSTRG.13507.1	hsa-miR-31-5p	CD34
MSTRG.3515.1	hsa-miR-365a-5p	CD34
MSTRG.7995.1	hsa-miR-210-5p	KSR2
MSTRG.26440.2	hsa-miR-6882-5p	MAP3K9
MSTRG.18099.1	hsa-miR-5698	KCNK3
MSTRG.13278.1	hsa-miR-509-5p	WNT9A
MSTRG.16201.1	hsa-miR-449a	2021-09-03
MSTRG.26440.2	hsa-miR-216a-3p	KSR2
MSTRG.17087.1	hsa-miR-509-3-5p	WNT9A
MSTRG.10259.1	hsa-miR-508-5p	GOLGA7B
MSTRG.10259.1	hsa-miR-4446-3p	RAB11FIP4
MSTRG.10259.1	hsa-miR-92b-5p	SBK1
MSTRG.7995.1	hsa-miR-431-5p	RAB11FIP4
ENST00000627566	hsa-miR-5698	CD34
MSTRG.16220.1	hsa-miR-877-3p	CD34
MSTRG.10259.1	hsa-miR-449c-5p	SRCIN1
MSTRG.16201.1	hsa-miR-216a-3p	MAP3K13
MSTRG.5618.1	hsa-miR-4446-3p	TMED3
MSTRG.7694.1	hsa-miR-210-5p	CACNA1I
MSTRG.19037.1	hsa-miR-1226-3p	MDGA1
MSTRG.26440.2	hsa-miR-148a-5p	KSR2
MSTRG.22318.1	hsa-miR-216a-3p	CD34
MSTRG.26440.2	hsa-miR-331-3p	GREM1
MSTRG.20417.1	hsa-miR-449b-5p	WNT9A
MSTRG.7995.1	hsa-miR-4758-3p	NECTIN1
MSTRG.21350.4	hsa-miR-331-3p	KSR2
MSTRG.25922.1	hsa-miR-4446-3p	TNS1
MSTRG.22318.1	hsa-miR-449c-5p	KCNK3
MSTRG.16201.1	hsa-miR-2682-5p	2021-09-03
ENST00000630242	hsa-miR-4446-3p	KIAA0513
MSTRG.10260.1	hsa-miR-4758-3p	KSR2
MSTRG.10260.1	hsa-miR-216a-3p	SLC7A5
MSTRG.3036.7	hsa-miR-508-5p	ZC3H12D
MSTRG.22400.1	hsa-miR-508-5p	CD34
MSTRG.5059.4	hsa-miR-30a-3p	GOLGA7B
MSTRG.10260.1	hsa-miR-4758-3p	RAB11FIP4
MSTRG.12336.1	hsa-miR-4446-3p	SLIT3
MSTRG.8730.1	hsa-miR-210-5p	LIF
MSTRG.661.9	hsa-miR-365a-5p	LMCD1
MSTRG.19035.1	hsa-miR-34a-5p	SLIT3
MSTRG.17322.1	hsa-miR-4446-3p	SLIT3
MSTRG.7995.1	hsa-miR-509-5p	SOX11
MSTRG.661.9	hsa-miR-31-5p	CD34
MSTRG.25922.1	hsa-miR-449b-5p	SLIT3
MSTRG.7694.1	hsa-miR-1226-3p	MAP3K9
MSTRG.661.9	hsa-miR-449b-5p	MDGA1
MSTRG.10260.1	hsa-miR-92b-5p	CACNA1I
MSTRG.3624.3	hsa-miR-4758-3p	KCNK3
MSTRG.10260.1	hsa-miR-708-5p	TMED3
MSTRG.10259.1	hsa-miR-4758-3p	OPRD1
MSTRG.26440.2	hsa-miR-216a-3p	MAP3K9
MSTRG.661.9	hsa-miR-508-5p	TNR
MSTRG.25036.2	hsa-miR-4433b-5p	LMCD1
MSTRG.19035.1	hsa-miR-2682-5p	KCTD16
MSTRG.17108.1	hsa-miR-552-3p	CD34
MSTRG.17108.1	hsa-miR-4286	CD34
MSTRG.1054.1	hsa-miR-449a	WNT9A
MSTRG.3150.1	hsa-miR-449a	GOLGA7B
MSTRG.3150.1	hsa-miR-6815-5p	NECTIN1
MSTRG.5618.1	hsa-miR-4443	KSR2
ENST00000441095	hsa-miR-216a-3p	SLC7A5
MSTRG.13711.1	hsa-miR-4443	ZC3H12D
ENST00000441095	hsa-miR-216a-3p	KSR2
MSTRG.1191.1	hsa-miR-4758-3p	MDGA1
MSTRG.26440.2	hsa-miR-449a	TMED3
MSTRG.16201.1	hsa-miR-5698	TMED3
ENST00000630242	hsa-miR-210-5p	GOLGA7B
MSTRG.18315.1	hsa-miR-34a-5p	KCTD16
MSTRG.3150.1	hsa-miR-4286	KIF1A
MSTRG.5059.2	hsa-miR-4446-3p	SYT16
MSTRG.3624.3	hsa-miR-449a	KCNK3
MSTRG.5059.2	hsa-miR-216a-3p	SLC7A5
MSTRG.10260.1	hsa-miR-210-5p	STX1B
ENST00000630242	hsa-miR-331-3p	RAB11FIP4
ENST00000630242	hsa-miR-148a-3p	KIAA0513
MSTRG.10260.1	hsa-miR-4443	SLC7A5
MSTRG.5618.1	hsa-miR-449b-3p	KIAA0513
MSTRG.16807.21	hsa-miR-4286	MDGA1
MSTRG.18099.1	hsa-miR-5698	MDGA1
MSTRG.26440.2	hsa-miR-4758-3p	NECTIN1
MSTRG.20417.1	hsa-miR-296-3p	WNT9A
MSTRG.1191.1	hsa-miR-34a-5p	KCNK3
ENST00000617529	hsa-miR-4446-3p	KSR2
MSTRG.10260.1	hsa-miR-331-3p	LIF
MSTRG.3036.7	hsa-miR-1269b	PDK1
MSTRG.5059.2	hsa-miR-1226-3p	PDK1
MSTRG.25922.1	hsa-miR-4446-3p	MDGA1
MSTRG.25036.2	hsa-miR-449c-5p	GFOD1
MSTRG.26440.2	hsa-miR-148a-5p	SYT16
MSTRG.16807.21	hsa-miR-449c-5p	KCNK3
MSTRG.16201.1	hsa-miR-5698	TMEM184A
MSTRG.18315.1	hsa-miR-509-5p	WNT9A
MSTRG.8730.1	hsa-miR-210-5p	STX1B
MSTRG.18099.1	hsa-miR-6815-5p	TNS1
MSTRG.13711.1	hsa-miR-4446-3p	SYT16
MSTRG.13711.1	hsa-miR-449b-5p	SRCIN1
MSTRG.1191.1	hsa-miR-216a-3p	LMCD1
MSTRG.1054.1	hsa-miR-6815-5p	TNS1
MSTRG.1191.1	hsa-miR-4728-3p	MDGA1
MSTRG.13511.1	hsa-miR-296-3p	ADARB2
MSTRG.8730.1	hsa-miR-449b-5p	ADM2
MSTRG.3150.1	hsa-miR-216a-5p	GOLGA7B
MSTRG.10260.1	hsa-miR-34a-5p	SRCIN1
MSTRG.661.9	hsa-miR-877-5p	CD34
MSTRG.5059.4	hsa-miR-345-5p	KSR2
MSTRG.26440.2	hsa-miR-34a-5p	ADM2
MSTRG.3036.7	hsa-miR-508-5p	OPRD1
MSTRG.1054.1	hsa-miR-509-3-5p	WNT9A
MSTRG.3036.7	hsa-miR-486-3p	SOX11
MSTRG.8730.1	hsa-miR-508-5p	GNAO1
MSTRG.5059.2	hsa-miR-4728-3p	GNB1L
MSTRG.7694.1	hsa-miR-486-3p	SBK1
MSTRG.26440.2	hsa-miR-508-5p	KSR2
MSTRG.17108.1	hsa-miR-486-3p	KCNK3
MSTRG.22400.1	hsa-miR-4446-3p	WNT9A
MSTRG.10259.1	hsa-miR-21-3p	SRCIN1
MSTRG.10260.1	hsa-miR-30a-3p	SYT16
MSTRG.26440.2	hsa-miR-877-3p	RAB11FIP4
MSTRG.5059.2	hsa-miR-216a-3p	ONECUT2
MSTRG.16220.1	hsa-miR-34a-5p	KCTD16
MSTRG.1191.1	hsa-miR-449c-5p	SLIT3
MSTRG.26440.2	hsa-miR-486-3p	RAB11FIP4
MSTRG.7995.1	hsa-miR-210-5p	PLEKHG4B
MSTRG.16220.1	hsa-miR-217	WNT9A
MSTRG.18315.1	hsa-miR-216a-3p	CD34
MSTRG.16220.1	hsa-miR-210-5p	MDGA1
MSTRG.22400.1	hsa-miR-2682-5p	KCTD16
MSTRG.2404.1	hsa-miR-34a-5p	PLEKHG4B
MSTRG.26440.2	hsa-miR-1226-3p	MAP3K9
MSTRG.10259.1	hsa-miR-708-5p	SRCIN1
ENST00000630242	hsa-miR-34a-5p	TMED3
MSTRG.12336.1	hsa-miR-210-3p	MDGA1
MSTRG.17087.1	hsa-miR-1269a	TNR
MSTRG.10260.1	hsa-miR-4446-3p	ADM2
MSTRG.3515.1	hsa-miR-508-5p	CD34
MSTRG.17322.1	hsa-miR-331-3p	MDGA1
MSTRG.19168.1	hsa-miR-365a-5p	ONECUT2
MSTRG.22318.1	hsa-miR-210-3p	MDGA1
MSTRG.2404.1	hsa-miR-5698	SYT12
MSTRG.22400.1	hsa-miR-4758-3p	KCNK3
MSTRG.19037.1	hsa-miR-6815-5p	CD34
ENST00000630242	hsa-miR-4443	MAP3K13
MSTRG.19168.1	hsa-miR-615-3p	KIF1A
MSTRG.19037.1	hsa-miR-4446-3p	MDGA1
MSTRG.16220.1	hsa-miR-486-3p	LMCD1
MSTRG.13511.1	hsa-miR-516b-5p	KCNK3
MSTRG.13278.1	hsa-miR-4443	SLIT3
MSTRG.3624.3	hsa-miR-331-3p	CD34
ENST00000630242	hsa-miR-331-3p	KSR2
MSTRG.12336.1	hsa-miR-4446-3p	TNS1
MSTRG.17115.1	hsa-miR-34a-5p	MDGA1
MSTRG.17087.1	hsa-miR-130b-3p	LMCD1
MSTRG.7694.1	hsa-miR-556-5p	GREM1
MSTRG.7694.1	hsa-miR-1226-3p	SBK1
MSTRG.17108.1	hsa-miR-6815-5p	CD34
MSTRG.10259.1	hsa-miR-449b-3p	POFUT2
MSTRG.18099.1	hsa-miR-4652-5p	LMCD1
MSTRG.3036.7	hsa-miR-5698	OPRD1
MSTRG.13711.1	hsa-miR-449c-5p	MAP3K9
MSTRG.16220.1	hsa-miR-486-3p	KCNK3
MSTRG.8730.1	hsa-miR-135a-5p	TMED3
MSTRG.17115.1	hsa-miR-513c-5p	KCTD16
MSTRG.7694.1	hsa-miR-210-5p	POFUT2
MSTRG.17087.1	hsa-miR-34a-5p	WNT9A
MSTRG.16201.1	hsa-miR-4532	SOX11
MSTRG.16201.1	hsa-miR-509-3-5p	MAP3K13
MSTRG.5059.4	hsa-miR-345-5p	ONECUT2
MSTRG.22400.1	hsa-miR-508-5p	GFOD1
MSTRG.1054.1	hsa-miR-516b-5p	GFOD1
MSTRG.5059.2	hsa-miR-5698	SYT12
MSTRG.4233.3	hsa-miR-514a-5p	2021-09-03
MSTRG.17108.1	hsa-miR-296-3p	ADARB2
MSTRG.2404.1	hsa-miR-937-3p	PLEKHG4B
MSTRG.19168.1	hsa-miR-449c-5p	KIF1A
MSTRG.5059.2	hsa-miR-4446-3p	KSR2
MSTRG.21350.4	hsa-miR-4443	MAP3K13
MSTRG.1191.1	hsa-miR-6815-5p	TNS1
MSTRG.19035.1	hsa-miR-449a	WNT9A
MSTRG.16807.21	hsa-miR-4284	KCNK3
MSTRG.3150.1	hsa-miR-1226-3p	NECTIN1
MSTRG.10259.1	hsa-miR-345-5p	ADM2
MSTRG.5618.1	hsa-miR-2682-5p	LIF
MSTRG.7995.1	hsa-miR-210-5p	ONECUT2
MSTRG.17108.1	hsa-miR-6815-5p	KCTD16
MSTRG.4233.3	hsa-miR-508-5p	KSR2
MSTRG.17087.1	hsa-miR-296-3p	MDGA1
MSTRG.19037.1	hsa-miR-210-5p	TNS1
MSTRG.3036.7	hsa-miR-6815-5p	GREM1
MSTRG.19035.1	hsa-miR-331-3p	TNS1
MSTRG.13278.1	hsa-miR-4433b-5p	TNR
ENST00000441095	hsa-miR-4446-3p	MAP3K9
ENST00000441095	hsa-miR-424-3p	SYT16
MSTRG.17322.1	hsa-miR-449c-5p	SLIT3
MSTRG.17115.1	hsa-miR-34a-5p	TNR
MSTRG.7694.1	hsa-miR-331-3p	RAB11FIP4
MSTRG.22400.1	hsa-miR-449b-5p	KCNK3
MSTRG.1191.1	hsa-miR-216a-3p	KCTD16
MSTRG.17087.1	hsa-miR-551a	KCTD16
MSTRG.1054.1	hsa-miR-708-3p	MDGA1
MSTRG.16220.1	hsa-miR-508-5p	TNR
MSTRG.22318.1	hsa-miR-331-3p	GFOD1
MSTRG.13278.1	hsa-miR-509-5p	ADARB2
MSTRG.16220.1	hsa-miR-34a-5p	SLIT3
MSTRG.22400.1	hsa-miR-708-5p	MDGA1
MSTRG.1191.1	hsa-miR-365a-5p	MDGA1
MSTRG.1054.1	hsa-miR-5698	MDGA1
MSTRG.5059.2	hsa-miR-486-3p	SBK1
MSTRG.10260.1	hsa-miR-34a-5p	GREM1
MSTRG.5059.4	hsa-miR-486-3p	STX1B
MSTRG.10260.1	hsa-miR-5698	RAB11FIP4
MSTRG.7995.1	hsa-miR-4446-3p	RAB11FIP4
MSTRG.3150.1	hsa-miR-449a	ADM2
MSTRG.13711.1	hsa-miR-4446-3p	OPRD1
MSTRG.22400.1	hsa-miR-212-3p	CD34
ENST00000441095	hsa-miR-449b-5p	TMED3
MSTRG.5618.1	hsa-miR-92b-3p	MAP3K13
MSTRG.1191.1	hsa-miR-6815-5p	KCTD16
MSTRG.19035.1	hsa-miR-212-3p	CD34
MSTRG.3624.3	hsa-miR-4758-3p	MDGA1
MSTRG.19168.1	hsa-miR-4758-3p	FOSL2
MSTRG.10260.1	hsa-miR-331-3p	SRCIN1
ENST00000441095	hsa-miR-6815-5p	BMF
MSTRG.21350.4	hsa-miR-296-3p	GOLGA7B
ENST00000630242	hsa-miR-34a-5p	GNB1L
MSTRG.16807.21	hsa-miR-514b-5p	KCTD16
MSTRG.5618.1	hsa-miR-1269b	LIF
MSTRG.1054.1	hsa-miR-34a-5p	MDGA1
MSTRG.26440.2	hsa-miR-486-3p	STX1B
MSTRG.26440.2	hsa-miR-1226-3p	POFUT2
MSTRG.10259.1	hsa-miR-708-5p	LIF
MSTRG.18315.1	hsa-miR-509-3-5p	WNT9A
MSTRG.17322.1	hsa-miR-4728-3p	MDGA1
MSTRG.18315.1	hsa-miR-331-3p	TNS1
MSTRG.22318.1	hsa-miR-449c-5p	TNR
MSTRG.26440.2	hsa-miR-654-5p	SBK1
MSTRG.22400.1	hsa-miR-4652-5p	LMCD1
MSTRG.13507.1	hsa-miR-216a-3p	KCTD16
MSTRG.4233.3	hsa-miR-486-3p	LIF
MSTRG.20850.1	hsa-miR-296-3p	ADARB2
MSTRG.17115.1	hsa-miR-92b-3p	GFOD1
MSTRG.5059.4	hsa-miR-486-3p	LIF
MSTRG.20850.1	hsa-miR-216a-3p	LMCD1
MSTRG.10259.1	hsa-miR-449b-3p	KSR2
MSTRG.22318.1	hsa-miR-4758-3p	GFOD1
MSTRG.22400.1	hsa-miR-708-5p	KCTD16
MSTRG.8730.1	hsa-miR-508-5p	RAB11FIP4
MSTRG.22400.1	hsa-miR-34a-5p	MDGA1
MSTRG.26440.2	hsa-miR-10b-3p	PLAC4
MSTRG.8730.1	hsa-miR-449a	GNB1L
MSTRG.5059.2	hsa-miR-296-3p	SYT12
MSTRG.16201.1	hsa-miR-331-3p	KSR2
MSTRG.7694.1	hsa-miR-345-5p	NECTIN1
MSTRG.25922.1	hsa-miR-877-3p	SLIT3
ENST00000630242	hsa-miR-4446-3p	TMED3
MSTRG.26440.2	hsa-miR-1226-3p	STX1B
MSTRG.17082.1	hsa-miR-216a-3p	KCTD16
MSTRG.17108.1	hsa-miR-216a-3p	CD34
MSTRG.17118.1	hsa-miR-3660	WNT9A
MSTRG.17322.1	hsa-miR-4443	TNS1
ENST00000623760	hsa-miR-4758-3p	KIAA0513
MSTRG.22318.1	hsa-miR-4446-3p	TNS1
MSTRG.7694.1	hsa-miR-331-3p	GNAO1
MSTRG.1191.1	hsa-miR-2682-5p	SLIT3
MSTRG.13507.1	hsa-miR-296-3p	MDGA1
MSTRG.22318.1	hsa-miR-4758-3p	TNR
MSTRG.13507.1	hsa-miR-4652-5p	MDGA1
MSTRG.16201.1	hsa-miR-210-5p	MAP3K13
MSTRG.26440.2	hsa-miR-345-5p	KIAA1644
MSTRG.5618.1	hsa-miR-4446-3p	SRCIN1
MSTRG.18315.1	hsa-miR-6815-5p	TNS1
MSTRG.13278.1	hsa-miR-486-3p	KCNK3
MSTRG.13278.1	hsa-miR-2682-5p	SLIT3
MSTRG.13278.1	hsa-miR-34a-5p	TNR
MSTRG.17322.1	hsa-miR-331-3p	CD34
MSTRG.13278.1	hsa-miR-92b-3p	GFOD1
MSTRG.10260.1	hsa-miR-34a-5p	ADM2
ENST00000630242	hsa-miR-331-3p	STX1B
MSTRG.18315.1	hsa-miR-34a-5p	MDGA1
MSTRG.4233.3	hsa-miR-508-5p	RAB11FIP4
MSTRG.5618.1	hsa-miR-508-5p	ONECUT2
MSTRG.4233.3	hsa-miR-4758-3p	NECTIN1
MSTRG.26440.2	hsa-miR-331-3p	SBK1
MSTRG.17115.1	hsa-miR-877-3p	CD34
ENST00000630242	hsa-miR-449c-5p	GNB1L
ENST00000630242	hsa-miR-5698	STX1B
MSTRG.17087.1	hsa-miR-6815-5p	KCTD16
MSTRG.1191.1	hsa-miR-34a-5p	WNT9A
MSTRG.5059.4	hsa-miR-4697-3p	SYT12
MSTRG.17108.1	hsa-miR-4286	LMCD1
MSTRG.5059.2	hsa-miR-216a-3p	RAB11FIP4
MSTRG.17118.1	hsa-miR-4758-3p	LMCD1
MSTRG.5059.4	hsa-miR-4446-3p	SYT16
MSTRG.13711.1	hsa-miR-6782-3p	GOLGA7B
MSTRG.22400.1	hsa-miR-877-3p	TNR
MSTRG.5059.2	hsa-miR-345-5p	NECTIN1
MSTRG.17087.1	hsa-miR-4446-3p	KCNK3
MSTRG.3036.7	hsa-miR-486-3p	PLEKHG4B
MSTRG.3036.7	hsa-miR-5698	SOX11
MSTRG.13711.1	hsa-miR-4446-3p	ADM2
MSTRG.17118.1	hsa-miR-210-3p	MDGA1
MSTRG.17115.1	hsa-miR-4446-3p	KCNK3
MSTRG.2404.1	hsa-miR-205-5p	PLEKHG4B
MSTRG.7995.1	hsa-miR-216a-3p	SLC7A5
MSTRG.5618.1	hsa-miR-449c-5p	GNB1L
MSTRG.10260.1	hsa-miR-296-3p	CACNA1I
MSTRG.26440.2	hsa-miR-708-5p	KIAA0513
MSTRG.10259.1	hsa-miR-4758-3p	KSR2
MSTRG.17108.1	hsa-miR-4446-3p	MDGA1
MSTRG.3624.3	hsa-miR-4758-3p	TNR
ENST00000630242	hsa-miR-1226-3p	STX1B
MSTRG.10259.1	hsa-miR-345-5p	NECTIN1
MSTRG.18099.1	hsa-miR-4652-5p	TNS1
MSTRG.5618.1	hsa-miR-4443	MAP3K13
MSTRG.8730.1	hsa-miR-449c-5p	MAP3K9
MSTRG.22400.1	hsa-miR-4446-3p	TNS1
MSTRG.20417.1	hsa-miR-5698	CD34
ENST00000630242	hsa-miR-486-3p	GNAO1
MSTRG.13711.1	hsa-miR-34a-5p	TMED3
MSTRG.13711.1	hsa-miR-187-3p	KSR2
MSTRG.19035.1	hsa-miR-4758-3p	TNR
ENST00000617529	hsa-miR-6815-5p	ONECUT2
MSTRG.7995.1	hsa-miR-216a-3p	MAP3K9
MSTRG.5059.4	hsa-miR-4728-3p	GNB1L
MSTRG.3036.7	hsa-miR-31-5p	OPRD1
MSTRG.13507.1	hsa-miR-449c-5p	GFOD1
MSTRG.7694.1	hsa-miR-210-5p	ONECUT2
MSTRG.20417.1	hsa-miR-449b-5p	SLIT3
MSTRG.17082.1	hsa-miR-34a-5p	SLIT3
MSTRG.13280.1	hsa-miR-486-3p	CD34
MSTRG.26440.2	hsa-miR-4446-3p	NECTIN1
MSTRG.1191.1	hsa-miR-449c-5p	KCNK3
MSTRG.13507.1	hsa-miR-449c-5p	KCNK3
MSTRG.2404.1	hsa-miR-654-5p	TMED3
MSTRG.13278.1	hsa-miR-654-5p	KCNK3
MSTRG.26440.2	hsa-miR-615-3p	GNB1L
MSTRG.3150.1	hsa-miR-4446-3p	SYT16
MSTRG.1191.1	hsa-miR-4286	CD34
MSTRG.20417.1	hsa-miR-508-5p	SLIT3
MSTRG.22400.1	hsa-miR-10b-3p	MDGA1
MSTRG.22400.1	hsa-miR-4652-5p	MDGA1
MSTRG.1054.1	hsa-miR-877-3p	GFOD1
MSTRG.17108.1	hsa-miR-217	WNT9A
MSTRG.17087.1	hsa-miR-877-3p	GFOD1
ENST00000623760	hsa-miR-4758-3p	ONECUT2
MSTRG.2404.1	hsa-miR-21-3p	MAP3K9
MSTRG.10260.1	hsa-miR-708-5p	KIAA0513
MSTRG.20417.1	hsa-miR-4446-3p	SLIT3
ENST00000617529	hsa-miR-1226-3p	ONECUT2
MSTRG.3515.1	hsa-miR-1226-3p	GFOD1
MSTRG.22400.1	hsa-miR-509-5p	ADARB2
MSTRG.16220.1	hsa-miR-1226-3p	GFOD1
MSTRG.3150.1	hsa-miR-4286	2021-09-03
MSTRG.26440.2	hsa-miR-4728-3p	GNB1L
MSTRG.1054.1	hsa-miR-216a-5p	KCTD16
ENST00000630242	hsa-miR-1269a	GNAO1
MSTRG.3624.3	hsa-miR-6782-3p	CD34
MSTRG.5059.2	hsa-miR-6815-5p	SBK1
MSTRG.22400.1	hsa-miR-296-3p	WNT9A
MSTRG.22400.1	hsa-miR-4758-3p	TNR
MSTRG.3515.1	hsa-miR-144-5p	ADARB2
ENST00000623760	hsa-miR-1226-3p	PDK1
MSTRG.16201.1	hsa-miR-148a-3p	KIAA0513
MSTRG.17108.1	hsa-miR-449c-5p	GFOD1
MSTRG.661.9	hsa-miR-449b-5p	KCNK3
ENST00000441095	hsa-miR-2682-5p	LIF
MSTRG.13278.1	hsa-miR-877-5p	KCNK3
ENST00000441095	hsa-miR-449a	GNB1L
MSTRG.26440.2	hsa-miR-6815-5p	POFUT2
MSTRG.2404.1	hsa-miR-508-5p	OPRD1
MSTRG.13278.1	hsa-miR-183-5p	TNS1
MSTRG.5059.2	hsa-miR-1226-3p	SBK1
MSTRG.13511.1	hsa-miR-449b-5p	SLIT3
ENST00000623760	hsa-miR-216a-3p	MAP3K13
MSTRG.18099.1	hsa-miR-216a-3p	LMCD1
MSTRG.4233.3	hsa-miR-216a-3p	SLC7A5
MSTRG.16201.1	hsa-miR-210-5p	TMEM184A
MSTRG.7995.1	hsa-miR-514a-5p	LIF
MSTRG.3036.7	hsa-miR-486-3p	SBK1
MSTRG.22400.1	hsa-miR-34a-5p	TNR
MSTRG.16201.1	hsa-miR-212-3p	TMED3
MSTRG.5059.2	hsa-miR-1226-3p	ONECUT2
MSTRG.16220.1	hsa-miR-34a-5p	KCNK3
MSTRG.661.9	hsa-miR-4443	SLIT3
MSTRG.13711.1	hsa-miR-210-3p	PLEKHG4B
MSTRG.10259.1	hsa-miR-4446-3p	OPRD1
MSTRG.16807.21	hsa-miR-6815-5p	LMCD1
MSTRG.16201.1	hsa-miR-708-5p	TMED3
MSTRG.17087.1	hsa-miR-216a-3p	KCTD16
MSTRG.7995.1	hsa-miR-4758-3p	KIAA0513
MSTRG.26440.2	hsa-miR-5698	RAB11FIP4
MSTRG.5059.4	hsa-miR-210-5p	GNAO1
MSTRG.17108.1	hsa-miR-4443	CD34
MSTRG.10259.1	hsa-miR-34a-5p	GOLGA7B
MSTRG.13280.1	hsa-miR-5698	MDGA1
MSTRG.3515.1	hsa-miR-5698	SLIT3
MSTRG.13278.1	hsa-miR-210-5p	TNS1
MSTRG.13280.1	hsa-miR-34a-5p	WNT9A
MSTRG.4233.3	hsa-miR-654-5p	TMED3
MSTRG.26440.2	hsa-miR-449b-5p	NECTIN1
ENST00000630242	hsa-miR-210-5p	SYT12
MSTRG.13711.1	hsa-miR-4446-3p	PLEKHG4B
MSTRG.7694.1	hsa-miR-1226-3p	STX1B
MSTRG.3624.3	hsa-miR-34a-5p	GFOD1
MSTRG.10259.1	hsa-miR-4758-3p	PLAC4
MSTRG.4233.3	hsa-miR-216a-3p	BMF
ENST00000630242	hsa-miR-210-5p	BMF
MSTRG.7694.1	hsa-miR-508-5p	GNB1L
MSTRG.19035.1	hsa-miR-508-5p	CD34
MSTRG.18315.1	hsa-miR-877-3p	TNR
MSTRG.3624.3	hsa-miR-449c-5p	SLIT3
MSTRG.12336.1	hsa-miR-21-3p	LMCD1
MSTRG.20850.1	hsa-miR-5698	WNT9A
MSTRG.7694.1	hsa-miR-210-5p	LIF
ENST00000630242	hsa-miR-1269b	LIF
MSTRG.13278.1	hsa-miR-331-3p	MDGA1
MSTRG.19168.1	hsa-miR-216a-3p	SYT12
MSTRG.18099.1	hsa-miR-2682-5p	SLIT3
MSTRG.5618.1	hsa-miR-4758-3p	KSR2
ENST00000623760	hsa-miR-6815-5p	KIAA0513
MSTRG.5059.2	hsa-miR-345-5p	ADM2
MSTRG.26440.2	hsa-miR-486-3p	LIF
MSTRG.5618.1	hsa-miR-135b-5p	TMED3
MSTRG.5059.4	hsa-miR-210-5p	STX1B
MSTRG.5618.1	hsa-miR-508-5p	GOLGA7B
MSTRG.22400.1	hsa-miR-508-5p	TNR
MSTRG.26440.2	hsa-miR-508-5p	GNB1L
MSTRG.3515.1	hsa-miR-2682-5p	KCTD16
MSTRG.5059.2	hsa-miR-216a-3p	GNB1L
MSTRG.13278.1	hsa-miR-4652-5p	CD34
MSTRG.17118.1	hsa-miR-6782-3p	CD34
ENST00000441095	hsa-miR-2682-5p	GNB1L
MSTRG.10259.1	hsa-miR-877-3p	OPRD1
ENST00000630242	hsa-miR-449c-5p	2021-09-03
MSTRG.21350.4	hsa-miR-34a-5p	GOLGA7B
ENST00000441095	hsa-miR-4446-3p	TMED3
MSTRG.10259.1	hsa-miR-210-5p	ONECUT2
MSTRG.18315.1	hsa-miR-210-5p	MDGA1
MSTRG.10260.1	hsa-miR-4758-3p	ONECUT2
MSTRG.13280.1	hsa-miR-552-3p	CD34
MSTRG.20850.1	hsa-miR-365a-5p	LMCD1
MSTRG.3036.7	hsa-miR-6815-5p	ZC3H12D
MSTRG.26440.2	hsa-miR-4758-3p	RAB11FIP4
MSTRG.18099.1	hsa-miR-216a-3p	TNR
MSTRG.3150.1	hsa-miR-4286	PDK1
MSTRG.661.9	hsa-miR-4446-3p	KCNK3
MSTRG.16201.1	hsa-miR-92b-5p	SBK1
MSTRG.13278.1	hsa-miR-365a-5p	MDGA1
MSTRG.26440.2	hsa-miR-4683	KSR2
MSTRG.20417.1	hsa-miR-877-3p	TNR
ENST00000617529	hsa-miR-4446-3p	ONECUT2
MSTRG.19035.1	hsa-miR-449c-5p	TNR
MSTRG.8730.1	hsa-miR-4532	SRCIN1
ENST00000441095	hsa-miR-5698	TMED3
MSTRG.16220.1	hsa-miR-877-3p	GFOD1
MSTRG.3150.1	hsa-miR-4446-3p	ZC3H12D
MSTRG.3036.7	hsa-miR-509-3-5p	SYT16
MSTRG.5059.4	hsa-miR-345-5p	PDK1
MSTRG.26440.2	hsa-miR-365a-5p	STX1B
MSTRG.26440.2	hsa-miR-4286	KSR2
ENST00000630242	hsa-miR-877-3p	KSR2
MSTRG.17108.1	hsa-miR-6815-5p	SLIT3
MSTRG.16807.21	hsa-miR-183-5p	TNS1
MSTRG.17118.1	hsa-miR-708-5p	KCTD16
MSTRG.17322.1	hsa-miR-877-3p	CD34
MSTRG.3515.1	hsa-miR-5698	WNT9A
MSTRG.19037.1	hsa-miR-6815-5p	LMCD1
MSTRG.5059.4	hsa-miR-210-5p	CACNA1I
MSTRG.17115.1	hsa-miR-4446-3p	WNT9A
MSTRG.13507.1	hsa-miR-3660	KCNK3
MSTRG.5059.2	hsa-miR-345-5p	PDK1
MSTRG.8730.1	hsa-miR-135b-5p	NECTIN1
ENST00000441095	hsa-miR-503-5p	ATP11A
MSTRG.5059.2	hsa-miR-4433b-5p	SBK1
MSTRG.19035.1	hsa-miR-4652-5p	TNS1
MSTRG.26440.2	hsa-miR-4443	SLC7A5
MSTRG.10260.1	hsa-miR-6815-5p	KIAA1644
MSTRG.17082.1	hsa-miR-144-5p	ADARB2
MSTRG.3036.7	hsa-miR-514a-5p	2021-09-03
ENST00000441095	hsa-miR-449c-5p	MAP3K9
ENST00000441095	hsa-miR-449b-5p	2021-09-03
MSTRG.3036.7	hsa-miR-514b-5p	PLEKHG4B
MSTRG.17082.1	hsa-miR-34a-5p	KCTD16
MSTRG.5059.2	hsa-miR-6815-5p	ZC3H12D
MSTRG.17322.1	hsa-miR-4446-3p	MDGA1
ENST00000617529	hsa-miR-1226-3p	KIAA1644
MSTRG.13511.1	hsa-miR-877-5p	KCNK3
MSTRG.16201.1	hsa-miR-183-5p	SYT16
MSTRG.3624.3	hsa-miR-509-3-5p	WNT9A
MSTRG.20850.1	hsa-miR-4446-3p	SLIT3
MSTRG.13511.1	hsa-miR-552-3p	CD34
MSTRG.7995.1	hsa-miR-210-5p	POFUT2
MSTRG.10260.1	hsa-miR-210-5p	ONECUT2
MSTRG.22400.1	hsa-miR-212-3p	KCNK3
MSTRG.25922.1	hsa-miR-21-3p	KCTD16
ENST00000630242	hsa-miR-216a-3p	BMF
MSTRG.1054.1	hsa-miR-877-3p	TNR
MSTRG.3515.1	hsa-miR-509-5p	ADARB2
MSTRG.4233.3	hsa-miR-449c-5p	GNB1L
ENST00000441095	hsa-miR-5698	RAB11FIP4
MSTRG.10260.1	hsa-miR-449a	2021-09-03
MSTRG.25922.1	hsa-miR-205-5p	GFOD1
MSTRG.5059.2	hsa-miR-6815-5p	GNB1L
MSTRG.26440.2	hsa-miR-187-3p	NECTIN1
MSTRG.3150.1	hsa-miR-6815-5p	KIF1A
MSTRG.20417.1	hsa-miR-877-3p	CD34
MSTRG.4233.3	hsa-miR-449c-5p	2021-09-03
MSTRG.10259.1	hsa-miR-210-5p	EPHB2
MSTRG.3150.1	hsa-miR-449b-5p	ADM2
MSTRG.8730.1	hsa-miR-34a-5p	GREM1
MSTRG.18315.1	hsa-miR-216a-3p	KCTD16
ENST00000441095	hsa-miR-4446-3p	KSR2
MSTRG.26440.2	hsa-miR-514a-5p	KSR2
MSTRG.3150.1	hsa-miR-1226-3p	PDK1
MSTRG.26440.2	hsa-miR-4446-3p	2021-09-03
MSTRG.26440.2	hsa-miR-1226-3p	SBK1
MSTRG.1191.1	hsa-miR-516b-5p	GFOD1
MSTRG.3150.1	hsa-miR-615-3p	ADM2
MSTRG.17115.1	hsa-miR-508-5p	SLIT3
MSTRG.19037.1	hsa-miR-1226-3p	GFOD1
MSTRG.1191.1	hsa-miR-449c-5p	GFOD1
MSTRG.16220.1	hsa-miR-877-3p	SLIT3
MSTRG.3150.1	hsa-miR-31-5p	SYT12
MSTRG.13278.1	hsa-miR-34a-5p	KCTD16
MSTRG.3036.7	hsa-miR-30a-3p	GOLGA7B
ENST00000630242	hsa-miR-331-3p	LIF
MSTRG.18099.1	hsa-miR-2682-5p	KCTD16
MSTRG.3515.1	hsa-miR-34a-5p	KCNK3
MSTRG.17118.1	hsa-miR-708-5p	GFOD1
ENST00000627566	hsa-miR-5698	SLIT3
MSTRG.16220.1	hsa-miR-449c-5p	KCTD16
MSTRG.26440.2	hsa-miR-92b-3p	CACNA1I
MSTRG.5618.1	hsa-miR-508-5p	PDK1
MSTRG.17118.1	hsa-miR-331-3p	TNS1
MSTRG.13278.1	hsa-miR-4697-3p	WNT9A
MSTRG.13511.1	hsa-miR-4443	CD34
MSTRG.13711.1	hsa-miR-34a-5p	GOLGA7B
MSTRG.16201.1	hsa-miR-514a-5p	PLEKHG4B
MSTRG.12336.1	hsa-miR-296-3p	CD34
ENST00000630242	hsa-miR-4281	SBK1
MSTRG.4233.3	hsa-miR-654-5p	MAP3K9
MSTRG.1054.1	hsa-miR-506-5p	ADARB2
MSTRG.26440.2	hsa-miR-449b-3p	KIAA0513
MSTRG.10259.1	hsa-miR-6815-5p	NECTIN1
MSTRG.13507.1	hsa-miR-205-5p	SLIT3
MSTRG.2404.1	hsa-miR-5698	TMED3
MSTRG.10259.1	hsa-miR-4758-3p	SYT12
MSTRG.20417.1	hsa-miR-4443	TNS1
ENST00000630242	hsa-miR-216a-3p	KSR2
MSTRG.16220.1	hsa-miR-296-3p	ADARB2
MSTRG.25036.2	hsa-miR-509-5p	ADARB2
MSTRG.1054.1	hsa-miR-508-5p	CD34
MSTRG.22400.1	hsa-miR-216a-3p	LMCD1
MSTRG.10260.1	hsa-miR-4281	RAB11FIP4
MSTRG.13278.1	hsa-miR-331-3p	CD34
ENST00000630242	hsa-miR-1226-3p	GOLGA7B
MSTRG.17082.1	hsa-miR-1226-3p	GFOD1
MSTRG.16807.21	hsa-miR-4652-5p	TNS1
MSTRG.13507.1	hsa-miR-449c-5p	SLIT3
MSTRG.16220.1	hsa-miR-6815-5p	LMCD1
ENST00000630242	hsa-miR-5698	RAB11FIP4
MSTRG.17322.1	hsa-miR-2682-5p	KCTD16
MSTRG.10259.1	hsa-miR-216a-3p	KSR2
MSTRG.3036.7	hsa-miR-449a	TMED3
MSTRG.5059.4	hsa-miR-486-3p	SYT12
MSTRG.18315.1	hsa-miR-210-5p	TNS1
MSTRG.4233.3	hsa-miR-449c-5p	PLAC4
MSTRG.17087.1	hsa-miR-216a-3p	LMCD1
MSTRG.10260.1	hsa-miR-4532	KIAA1644
MSTRG.5059.4	hsa-miR-4446-3p	MAP3K9
MSTRG.10260.1	hsa-miR-210-5p	KSR2
MSTRG.16220.1	hsa-miR-6815-5p	SLIT3
MSTRG.3150.1	hsa-miR-345-5p	PDK1
MSTRG.7995.1	hsa-miR-508-5p	SNPH
MSTRG.13280.1	hsa-miR-708-5p	KCTD16
MSTRG.22400.1	hsa-miR-514a-5p	MDGA1
MSTRG.5059.2	hsa-miR-877-3p	KIAA1644
MSTRG.13711.1	hsa-miR-449c-5p	FOSL2
MSTRG.16201.1	hsa-miR-135b-5p	TMED3
MSTRG.18099.1	hsa-miR-6815-5p	MDGA1
MSTRG.18315.1	hsa-miR-34a-5p	WNT9A
MSTRG.17087.1	hsa-miR-508-5p	SLIT3
MSTRG.5618.1	hsa-miR-4758-3p	ONECUT2
MSTRG.17118.1	hsa-miR-4758-3p	GFOD1
ENST00000623760	hsa-miR-508-5p	ZC3H12D
MSTRG.10259.1	hsa-miR-210-5p	SYT12
MSTRG.5059.4	hsa-miR-4446-3p	KSR2
MSTRG.5618.1	hsa-miR-508-5p	RAB11FIP4
MSTRG.19035.1	hsa-miR-34a-5p	TNR
MSTRG.7995.1	hsa-miR-508-5p	ONECUT2
MSTRG.10259.1	hsa-miR-92b-5p	POFUT2
MSTRG.661.9	hsa-miR-449b-5p	WNT9A
MSTRG.17118.1	hsa-miR-5698	MDGA1
MSTRG.1191.1	hsa-miR-4446-3p	MDGA1
MSTRG.5618.1	hsa-miR-4758-3p	GOLGA7B
MSTRG.25036.2	hsa-miR-708-5p	MDGA1
MSTRG.22318.1	hsa-miR-877-3p	GFOD1
MSTRG.13507.1	hsa-miR-508-5p	TNR
MSTRG.22400.1	hsa-miR-486-3p	WNT9A
MSTRG.16220.1	hsa-miR-6815-5p	TNS1
MSTRG.16201.1	hsa-miR-486-3p	SYT12
MSTRG.13278.1	hsa-miR-216a-3p	LMCD1
MSTRG.3036.7	hsa-miR-486-3p	SYT12
MSTRG.13711.1	hsa-miR-187-3p	PLEKHG4B
MSTRG.26440.2	hsa-miR-365a-5p	ATP11A
MSTRG.3150.1	hsa-miR-296-3p	2021-09-03
MSTRG.661.9	hsa-miR-516b-5p	KCNK3
MSTRG.3150.1	hsa-miR-1226-3p	CACNA1I
MSTRG.20850.1	hsa-miR-365a-5p	CD34
MSTRG.661.9	hsa-miR-877-3p	TNR
MSTRG.16201.1	hsa-miR-216a-3p	GREM1
MSTRG.5618.1	hsa-miR-1269a	ATP11A
MSTRG.1054.1	hsa-miR-2682-5p	KCTD16
MSTRG.5618.1	hsa-miR-4443	KIAA1644
MSTRG.2404.1	hsa-miR-296-3p	GOLGA7B
MSTRG.17087.1	hsa-miR-4728-3p	GFOD1
MSTRG.20850.1	hsa-miR-4446-3p	WNT9A
MSTRG.10260.1	hsa-miR-4443	GNB1L
MSTRG.13507.1	hsa-miR-296-3p	CD34
MSTRG.22318.1	hsa-miR-449c-5p	KCTD16
MSTRG.13507.1	hsa-miR-449c-5p	TNR
MSTRG.1054.1	hsa-miR-6815-5p	SLIT3
MSTRG.17087.1	hsa-miR-877-3p	CD34
MSTRG.18315.1	hsa-miR-4758-3p	LMCD1
MSTRG.7694.1	hsa-miR-216a-3p	GREM1
MSTRG.21350.4	hsa-miR-4443	KIAA1644
MSTRG.10259.1	hsa-miR-508-5p	RAB11FIP4
MSTRG.17108.1	hsa-miR-296-3p	MDGA1
ENST00000630242	hsa-miR-4443	ZC3H12D
MSTRG.22318.1	hsa-miR-508-5p	CD34
MSTRG.7694.1	hsa-miR-331-3p	LIF
MSTRG.19035.1	hsa-miR-2682-5p	SLIT3
MSTRG.22318.1	hsa-miR-210-5p	GFOD1
MSTRG.5059.2	hsa-miR-1226-3p	GOLGA7B
MSTRG.16201.1	hsa-miR-4446-3p	ADM2
MSTRG.16220.1	hsa-miR-216a-3p	CD34
MSTRG.7995.1	hsa-miR-450a-1-3p	ZC3H12D
MSTRG.3036.7	hsa-miR-216a-3p	SBK1
MSTRG.7995.1	hsa-miR-135b-3p	SYT16
MSTRG.16201.1	hsa-miR-4446-3p	KSR2
MSTRG.17108.1	hsa-miR-516b-5p	KCNK3
MSTRG.10259.1	hsa-miR-4446-3p	MAP3K9
ENST00000630242	hsa-miR-4446-3p	MAP3K9
MSTRG.10259.1	hsa-miR-877-3p	RAB11FIP4
MSTRG.26440.2	hsa-miR-216a-3p	SBK1
MSTRG.1191.1	hsa-miR-216a-3p	CD34
MSTRG.19035.1	hsa-miR-34a-5p	MDGA1
MSTRG.3150.1	hsa-miR-2682-5p	2021-09-03
MSTRG.16807.21	hsa-miR-130b-3p	LMCD1
MSTRG.16201.1	hsa-miR-5698	OPRD1
ENST00000630242	hsa-miR-345-5p	BMF
MSTRG.10259.1	hsa-miR-296-3p	GOLGA7B
MSTRG.10260.1	hsa-miR-4446-3p	GNB1L
MSTRG.5618.1	hsa-miR-2682-5p	2021-09-03
[truncated: 1,505 more rows]
[truncated: 3 more columns]
